1 **The ecological genetics of *Pseudomonas syringae* residing on the kiwifruit leaf**  
2 **surface**

3 Christina Straub<sup>1</sup>, Elena Colombi<sup>1</sup>, Li Li<sup>2</sup>, Hongwen Huang<sup>2,3</sup>, Matthew D. Templeton<sup>4</sup>,  
4 Honour C. McCann<sup>1\*</sup>, Paul B. Rainey<sup>1, 5, 6\*</sup>

5 <sup>1</sup>New Zealand Institute for Advanced Study, Massey University, Auckland, New

6 Zealand. <sup>2</sup>Key Laboratory of Plant Germplasm Enhancement and Specialty

7 Agriculture, Wuhan Botanical Garden, Chinese Academy of Sciences, Wuhan, China.

8 <sup>3</sup>Key Laboratory of Plant Resources Conservation and Sustainable Utilization, South

9 China Botanical Garden, Chinese Academy of Sciences, Guangzhou, China. <sup>4</sup>Plant and

10 Food Research, Auckland, New Zealand. <sup>5</sup>Max Planck Institute for Evolutionary

11 Biology, Department of Microbial Population Biology, Plön, Germany. <sup>6</sup>École

12 Supérieure de Physique et de Chimie Industrielles de la Ville de Paris (ESPCI Paris

13 Tech), Laboratoire de Génétique de l'Evolution, Paris, France. \* Joint senior authors

14 **CORRESPONDENCE:** Christina Straub, New Zealand Institute for Advanced Study,

15 Massey University, Private Bag 102 904, Auckland 0745, New Zealand. Telephone:

16 +64 9 4140800 ext 43811. e-mail: c.straub@massey.ac.nz

17 **RUNNING TITLE (50 CHARACTERS)**

18 Ecological genetics of *Pseudomonas syringae*

## 19 ORIGINALITY-SIGNIFICANT STATEMENT

20 Bacterial pathogen populations are often studied with little consideration of co-  
21 occurring microbes and yet interactions between pathogens and commensals can  
22 affect both population structure and disease progression. A fine-scale sampling of  
23 commensals present on kiwifruit leaves during an outbreak of bleeding canker  
24 disease caused by *P. syringae* pv. *actinidiae* reveals a clonal population structure. A  
25 new clade of non-pathogenic *P. syringae* (PG3a) appears to be associated with  
26 kiwifruit on a global scale. The presence of PG3a on kiwifruit has significant effects  
27 on the outcome of infection by *P. syringae* pv. *actinidiae*. This emphasises the value  
28 of studying the effect of co-occurring bacteria on pathogen-plant interactions.

## 29 SUMMARY

30 Interactions between commensal microbes and invading pathogens are  
31 understudied, despite their possible impact on pathogen population structure and  
32 infection processes. We describe the population structure and genetic diversity of a  
33 broad range of co-occurring *Pseudomonas syringae* isolated from infected and  
34 uninfected kiwifruit during an outbreak of bleeding canker disease caused by *P.*  
35 *syringae* pv. *actinidiae* (*Psa*) in New Zealand. Overall population structure was clonal  
36 and affected by ecological factors including infection status and cultivar. Most  
37 isolates are members of a new clade in phylogroup 3 (PG3a), also present on  
38 kiwifruit leaves in China and Japan. Stability of the polymorphism between  
39 pathogenic *Psa* and commensal *P. syringae* PG3a isolates from the same host was  
40 tested using reciprocal invasion from rare assays *in vitro* and *in planta*. *P. syringae*

41 G33C (PG3a) inhibited *Psa* NZ54, while the presence of *Psa* NZ54 enhanced the  
42 growth of *P. syringae* G33C. This effect could not be attributed to virulence activity  
43 encoded by the Type 3 secretion system of *Psa*. Together our data contribute toward  
44 the development of an ecological perspective on the genetic structure of pathogen  
45 populations.

## 46 INTRODUCTION

47 Kiwifruit (*Actinidia* spp.) cultivation is challenged by outbreaks of the  
48 bacterial pathogen *Pseudomonas syringae* pv. *actinidiae* (*Psa*) – the causative agent  
49 of bleeding canker disease. The latest outbreak was first reported in Italy in 2008  
50 (Balestra *et al.*, 2008) before spreading rapidly through most kiwifruit growing  
51 regions of the world (Abelleira *et al.*, 2011; Everett *et al.*, 2011; Koh *et al.*, 2012;  
52 Zhao *et al.*, 2013; Sawada, 2015), arriving in New Zealand in 2010 (Everett *et al.*,  
53 2011).

54 As a pathogen, *Psa* faces the challenge of colonising diverse environments  
55 before proliferating in the apoplast and vascular tissues. Colonisation of leaf surfaces  
56 prior to invasion is a key infection stage (Wilson and Lindow, 1994; Wilson *et al.*,  
57 1999; Monier and Lindow, 2003; Pfeilmeier *et al.*, 2016), and *Psa* is likely to  
58 encounter and interact with a diverse range of plant-colonising bacteria (Hirano and  
59 Upper, 2000; Lindow and Brandl, 2003). Physical proximity increases the likelihood  
60 of competitive interactions affecting disease outcomes (Lindow and Brandl, 2003;  
61 Hibbing *et al.*, 2010) and increases the probability of horizontal gene transfer  
62 (Sawada *et al.*, 1999; Polz *et al.*, 2013; Colombi *et al.*, 2017).

63 Istock *et al.* (1992) made a particularly persuasive case for recognition of and  
64 incorporation of local context in the study of bacterial population biology drawing  
65 attention to effects on genetic structure (Souza *et al.*, 1992; Haubold and Rainey,  
66 1996; Spratt and Maiden, 1999). The impact of studying only focal pathogen  
67 populations (Spratt and Maiden, 1999; Cordero *et al.*, 2012; Shapiro *et al.*, 2012;  
68 Shapiro and Polz, 2014; Rosen *et al.*, 2015) is particularly apparent in the case of  
69 *Neisseria meningitidis* (Maynard Smith *et al.*, 1993; Caugant and Maiden, 2009;  
70 Bratcher *et al.*, 2014). Biased sampling of symptomatic *N. meningitidis* produces  
71 evidence of linkage disequilibrium, yet the inclusion of *N. meningitidis* from  
72 asymptomatic meningococcal infections reveals the population structure of *N.*  
73 *meningitidis* to be non-clonal (Maynard Smith *et al.*, 1993; Fraser *et al.*, 2005).

74 Bacterial interactions are context-dependent, ranging from synergistic to  
75 antagonistic, and may have both local and global effects on the plant host  
76 (Stubbenieck *et al.*, 2016). Antagonistic or competitive interactions between  
77 microbes may be direct or indirect, resulting in the inhibition of growth or even  
78 killing (Lindow, 1986; Völksch and May, 2001; Berlec, 2012; Hockett *et al.*, 2015;  
79 Nakahara *et al.*, 2016). Synergistic interactions occur when multiple types cooperate  
80 to cause disease (Singer, 2010; Lamichhane and Venturi, 2015). For example, *P.*  
81 *savastanoi* pv. *savastanoi*, causative agent of olive knot disease, interacts with non-  
82 pathogenic endophytes *Erwinia sp.* and *Pantoea sp.* in cankers, enhancing the  
83 severity of disease (Marchi *et al.*, 2006; Moretti *et al.*, 2011; Buonauro *et al.*, 2015).  
84 Synergistic interactions can also be exploitative: bacteria lacking virulence factors

85 can reap benefits from co-existing pathogenic isolates (Young, 1974; Hirano *et al.*,  
86 1999; Macho *et al.*, 2007; Rufián *et al.*, 2017).

87 *P. syringae* is a member of the phyllosphere and engages in both commensal  
88 and pathogenic interactions with plants (Hirano and Uppur, 2000; Mohr *et al.*, 2008).  
89 The diversity and population structure of *P. syringae* has been investigated using  
90 both multilocus sequence typing (MLST) and genome sequence analysis of  
91 pathogenic isolates collected from diseased plants (Sarkar and Guttman, 2004;  
92 Hwang *et al.*, 2005; Baltrus *et al.*, 2011; McCann *et al.*, 2013, 2017; Fujikawa and  
93 Sawada, 2016; Nowell *et al.*, 2016), but the broader context of *P. syringae* inhabiting  
94 the phyllosphere and its impact on pathogen population structure is largely  
95 unknown.

96 Here we describe the population structure of the *P. syringae* species complex  
97 inhabiting the kiwifruit phyllosphere during an outbreak of bleeding canker disease  
98 in New Zealand. Using an MLST scheme, we reveal a largely clonal population  
99 structure, but show that genetic diversity is significantly affected by ecological  
100 factors such as infection status and cultivar. We identified members of four *P.*  
101 *syringae* phylogroups (PG1, PG2, PG3 and PG5) and recovered a new monophyletic  
102 clade within PG3 (PG3a) associated with kiwifruit on a global scale. Investigations  
103 into the ecological interactions between a representative of this new clade and *Psa*  
104 reveal PG3a inhibits *Psa* proliferation, while *Psa* in turn has a beneficial effect on  
105 PG3a growth in kiwifruit.

## 106 RESULTS

### 107 Phyllosphere diversity of *Pseudomonas syringae*

108 Four housekeeping genes (*gapA*, *gyrB*, *gltA*, *rpoD*) were sequenced for each  
109 of 148 *P. syringae* isolated from two varieties of kiwifruit ('Hayward' and 'Hort16A')  
110 in both uninfected and *Psa*-infected orchards. Rarefaction analysis indicates  
111 saturation of the sampling effort (Figure S1). The infected 'Hayward' orchard  
112 displayed the highest  $\alpha$ -diversity ( $D=0.904$ ), while the uninfected 'Hort16A' orchard  
113 displayed the least  $\alpha$ -diversity ( $D=0.737$ ). There was low evenness (ED) among all  
114 sampling sites (0.136 to 0.290). Similarly, the four different sampling sites shared  
115 few species (Sørensen's index of dissimilarity = 0.847).

### 116 Multilocus sequence typing

117 45 unique sequence types (ST) were discovered among the 148 sequenced  
118 strains. All STs were novel, except for ST904 (*Psa*), and not described in the Plant  
119 Associated and Environmental Microbes Database (PAMDB). For a more global  
120 analysis, *P. syringae* allelic profiles were sourced from PAMDB, Tomihama *et al.*  
121 (2016) and Visnovsky *et al.* (2016).

122 Infected orchards (both 'Hayward' and 'Hort16A') harboured the highest  
123 number of unique STs, sharing only three STs between them (Figure S2). No STs were  
124 present in all four orchards, but two STs were found in three orchards (ST1 and ST3).  
125 From the perspective of clonal complexes (CC), the predominant ST (predicted  
126 founder) was present along with several SLVs (single locus variants). Two clonal  
127 complexes (CC) (21 strains), 5 doubletons (32 strains) and 28 singletons (95 strains)

128 were identified (Figure S3). CC1 and CC2 are comprised of 11 and 10 strains,  
129 respectively. ST904 (*Psa*, 15/148) and ST1 (PG3, 24/148) made up 25% of the sample  
130 (Figure S3). Strikingly, ST3 (PG3a) was isolated from three out of four orchards and  
131 was also sampled from uninfected gold (*A. chinensis* var. *chinensis*) and green (*A.*  
132 *chinensis* var. *deliciosa*) kiwifruit in NZ (2010) (Visnovsky *et al.*, 2016) and Japan  
133 (2015) (Tomihama *et al.*, 2016), respectively (Figure 1). ST16 was also recovered  
134 from uninfected kiwifruit leaves in NZ in both 1991 and 2013. Other Japanese  
135 kiwifruit STs group closely with *P. syringae* originating from kiwifruit in NZ.

### 136 **Sequence diversity**

137         The total concatenated alignment length was 2010 bp with no insertions or  
138 deletions detected for either of the four loci. The number of alleles ranged from 25  
139 (*gapA*) to 35 (*rpoD*) (Table 1). There were a total of 412 polymorphic sites, ranging  
140 from 80 (16.81%, *gapA*) to 145 (28.6%, *gyrB*). The nucleotide diversity index  $\pi$  and  
141 Watterson's  $\theta$  were highly consistent among loci, varying from 0.040 to 0.055 and  
142 0.024 to 0.041 respectively. The average GC content of 57.99% is similar to that  
143 found in other *P. syringae* studies (59- 61%), however *gyrB* displayed an unusually  
144 low GC content of 53.15%. The pairwise genetic difference within phylogroups (PGs)  
145 was not greater than 2.7%, whereas among PGs the variability ranged from 6-11%  
146 (Table 2), consistent with previous accounts of genetic variability for *P. syringae*  
147 (Sarkar and Guttman, 2004; Morris *et al.*, 2010; Berge *et al.*, 2014).

## 148 **Genetic diversity varies by host cultivar and infection status**

149 To test whether genetic diversity was influenced by the presence of  
150 ecological structure, multivariate analyses (PERMANOVA) were performed. A highly  
151 significant difference in genetic diversity was observed among sampled orchards  
152 (Pseudo-F = 5.99,  $P < 0.0001$ ); with pairwise Permanova tests revealing that the  
153 uninfected green orchard differed significantly from every other orchard ( $P < 0.003$ ).  
154 The cultivar ('Hayward' vs. 'Hort16A') (Pseudo-F = 5.62,  $P < 0.001$ ) and infection status  
155 of an orchard (Pseudo-F = 11.72,  $P < 0.001$ ) also had a significant effect on genetic  
156 diversity, whereas no temporal effect was found (Pseudo-F = 1.10,  $P > 0.34$ ). When  
157 testing the nested effect of all three factors, only the infection status (Pseudo-F =  
158 6.42,  $P < 0.01$ ) had a significant impact on genetic diversity (Table S3).

## 159 **Recombination among *P. syringae***

160 Intragenic recombination rates ( $\rho$ ) ranged from 0.012 (*rpoD*) to 0.038 (*gyrB*)  
161 and 0.006 for the concatenated dataset. The ratio  $\epsilon$  (recombination rate/mutation  
162 rate) ranged from 0.187 (concatenated) to 0.931 (*gyrB*) suggesting that any single  
163 nucleotide polymorphism is up to five times more likely to have arisen from a  
164 mutation than recombination (Table 3).

165 Clustering sequences by PG revealed no evidence of recombination within  
166 PG1 and PG5 ( $\rho=0$ ), however for these phylogroups the sample size was low. There  
167 was evidence of recombination in PG3, more specifically for *gltA* ( $\epsilon=1.18$ ) and *rpoD*  
168 ( $\epsilon=4.07$ ), whereas in PG2 recombination was evident in *rpoD* ( $\epsilon=1.734$ ) alone. This  
169 level of recombination is consistent with earlier reports (Sarkar and Guttman, 2004).



170 Recombination was neither affected by the host cultivar or infection status (Table  
171 S4). The analysis was repeated with the inclusion of non-redundant global strains.  
172 Overall, intergenic recombination rates were low among PGs, ranging from 0.005 to  
173 0.012 for the concatenated dataset (Table S5). In order to pinpoint any effects of  
174 recombination on phylogenetic reconstruction, single gene trees were constructed  
175 and compared. Tree topologies were significantly different from each other and  
176 from the concatenated dataset (SH test,  $P < 0.05$ ) (Figure S4).

### 177 **A kiwifruit-associated clade of *P. syringae***

178       Maximum likelihood trees built using the concatenated alignment of unique  
179 STs revealed that nearly all NZ *P. syringae* kiwifruit isolates fell within four PGs: PG1  
180 (13%), PG2 (29%) and PG3 (56%), with only a few isolates falling into PG5 (2%, Figure  
181 2). Strikingly, within PG3 all NZ kiwifruit-associated isolates grouped within a new  
182 clade of PG3, hereafter referred to as PG3a. The uninfected orchards showed a  
183 higher number of PG3a isolates compared to infected orchards, although no  
184 influence of infection status was reflected in the number of unique sequence types  
185 (Table S1). This new subclade of PG3 was briefly described from a small-scale  
186 sampling of Japanese kiwifruit (clade KID0001, Tomihama *et al.* 2016). We also found  
187 that two strains isolated from kiwifruit in NZ in 2010 and 2011 (Visnovsky *et al.*,  
188 2016) belong to this subclade.

189 This discovery led us to question whether the PG3a subclade might be prevalent on  
190 kiwifruit vines in other countries. To this end we interrogated an unpublished set of  
191 *P. syringae* strains collected from kiwifruit leaves in China (sampling as described in  
192 McCann *et al.* (2017), GenBank accession numbers: MG674624 – MG674645). A

193 phylogenetic tree based on *gltA* for NZ, Japanese and Chinese kiwifruit isolates  
194 revealed that isolates obtained from Chinese kiwifruit also clustered within PG3a  
195 (Figure 3). Interestingly, included in this group is isolate 47L9, which was collected  
196 from tea leaves (*Camellia* sp.) growing in a former kiwifruit orchard in China. No  
197 other *P. syringae* strain from the PAMDB database grouped with PG3a, suggesting  
198 PG3a is persistently associated with kiwifruit on a global scale.

### 199 **Ecological interactions between PG3a and PG1**

200 To assess whether kiwifruit-associated PG3a strains are stably maintained  
201 with *Psa* (PG1), co-inoculation experiments were performed *in vitro* and *in planta*.  
202 Two isolates sampled from the same leaf were chosen for these experiments as they  
203 were isolated from the same leaf: *P. syringae* G33C (ST1, PG3a) and *Psa* NZ54  
204 (ST904, PG1).

### 205 **In vitro dynamics**

206 *Psa* NZ54 and *P. syringae* G33C showed similar growth dynamics when grown  
207 individually *in vitro* (Figure 4). However, when co-inoculated in liquid King's B (KB)  
208 media at an equal starting ratio, *Psa* NZ54 growth was significantly reduced (up to  
209 100-fold) at 24 h ( $P < 0.001$ , paired *t*-tests). This effect was amplified in shaken liquid  
210 minimal M9 medium, which mimics the nutrient-poor conditions encountered on  
211 the leaf surface (Hernández-Morales *et al.*, 2009): *Psa* NZ54 population density  
212 collapsed by 20 h in shaken M9 media (relative fitness  $-12.1 \pm 0.09$ , Figure 4).

213 In order to establish whether the instability of the interaction was influenced  
214 by the ratio of founder cells, we investigated whether *P. syringae* G33C could invade

215 from rare initial frequency. *P. syringae* G33C successfully invaded from rare after  
216 only 24 h in both rich KB and minimal M9 media (10:1 *Psa* NZ54 : *P. syringae* G33C)  
217 and reached a similar population size as when cultured on its own in M9 (Figure 5A).  
218 Conversely, *Psa* NZ54 also invaded *P. syringae* G33C from rare (1:10 *Psa* NZ54 : *P.*  
219 *syringae* G33C), though it established a 100-fold reduced population size of  $10^5 - 10^6$   
220 cfu ml<sup>-1</sup> compared to growth alone. The population collapse of *Psa* NZ54 in shaken  
221 M9, as observed for the 1:1 competition experiments, was once again observed  
222 (Figure 5B). The striking suppression of *Psa* NZ54 by *P. syringae* G33C was  
223 unambiguously repeated across three experiments. *P. syringae* G33C outcompetes  
224 *Psa* NZ54, though both isolates can invade from rare *in vitro* (with the exception of  
225 *Psa* NZ54 in shaken M9), which suggests that in a controlled environment the  
226 polymorphism is stable.

## 227 ***In planta dynamics***

228 *In planta* experiments were performed on two gold cultivars, 'Hort16A' and  
229 'SunGold', to determine whether *Psa* NZ54 and *P. syringae* G33C also form a stable  
230 polymorphism on kiwifruit leaves. *P. syringae* G33C established an epiphytic and  
231 endophytic population size in both cultivars (Figure 6) and did not produce any  
232 visible symptoms in 'Hort16A' and 'SunGold' (Figure S5, Figure S6). *Psa* NZ54  
233 attained a population size at least 10,000-fold greater than *P. syringae* G33C in both  
234 hosts. However, endophytic and epiphytic growth were reduced 10-fold in 'SunGold'  
235 compared to 'Hort16A' ( $P < 0.05$ , Mann-Whitney U test). Plants inoculated with *Psa*  
236 NZ54 developed the first leaf spots at 4 dpi and exhibited severe symptoms at 7 dpi

237 in the more susceptible 'Hort16A', whereas in 'SunGold' leaves displayed only minor  
238 symptoms at 7 dpi.

239 In 1:1 competition experiments non-pathogenic *P. syringae* G33C maintained  
240 a stable population size. The presence of *Psa* NZ54 had a highly significant positive  
241 effect on the growth of *P. syringae* G33C in both plant hosts (Figure 6A&B). *P.*  
242 *syringae* G33C established up to 1000-fold higher epiphytic population densities in  
243 'Hort16A' ( $P < 0.01$ , paired *t*-tests) and 10-fold higher epiphytic and endophytic  
244 population densities in 'SunGold' plants ( $P < 0.05$ , paired *t*-test) compared to its  
245 individual growth. Co-inoculated *Psa* NZ54 exhibited a significant reduction ( $P < 0.05$ ,  
246 paired *t*-test) in epiphytic and endophytic growth on 'Hort16A' in the presence of *P.*  
247 *syringae* G33C, but only in the early stages of the experiment. On 'SunGold' the  
248 diminished growth of *Psa* NZ54 was more pronounced, with a 100-fold decrease for  
249 the endophytic population at 7 dpi ( $P < 0.05$ , paired *t*-test, Figure 6B). Co-inoculated  
250 'Hort16A' plants exhibited a notable delay in symptom onset compared to singly  
251 inoculated plants (Figure S5), whereas there was no difference for 'SunGold' (Figure  
252 S6). The increased fitness of *Psa* NZ54 relative to *P. syringae* G33C in 'Hort16A'  
253 competition experiments was reflected in the relative fitness parameters ( $0.7 \pm 0.1^*$   
254 for epiphytic and  $4.9 \pm 0.8^*$  for endophytic,  $*P < 0.05$ , *t*-test), whereas in 'SunGold'  
255 plants *P. syringae* G33C performed better in the epiphytic environment ( $-1.6 \pm 0.2$ ;  
256  $4.7 \pm 0.1^*$  for endophytic growth).

257 To assess whether the heightened growth of *P. syringae* G33C in the  
258 presence of *Psa* NZ54 was due to the virulence activity of the pathogen elicited by  
259 the Type 3 Secretion System (T3SS), the competition experiment was performed

260 using a T3SS deficient mutant (*Psa* NZ13  $\Delta$ *hrcC*). Epiphytic growth of *P. syringae*  
261 G33C on ‘SunGold’ remained elevated when co-inoculated with *Psa* NZ13  $\Delta$ *hrcC*,  
262 indicating the virulence activity encoded by the T3SS was not responsible for the  
263 advantage conferred to the non-pathogenic strain ( $P < 0.05$ , paired *t*-test, Figure 6C).

264 A rarity threshold for *P. syringae* G33C determines the ability to establish a stable  
265 population *in planta*. Upon co-inoculation in a 100:1 (*Psa* NZ54 : *P. syringae* G33C)  
266 ratio on ‘Hort16A’, *P. syringae* G33C was able to invade from rare over the first 4  
267 days, but was then excluded by *Psa* NZ54 (Figure 7B). An initial increase in growth of  
268 *P. syringae* G33C from 0 dpi to 4 dpi was followed by a population collapse at 7 dpi  
269 with no endophytic growth detected and minimal epiphytic growth in environments  
270 dominated by *Psa* NZ54. Conversely, *Psa* NZ54 grew to the same population size in  
271 the presence of *P. syringae* G33C, as when inoculated individually ( $P > 0.1$ , paired *t*-  
272 tests).

273 In the reciprocal experiment (1:100 *Psa* NZ54 : *P. syringae* G33C), *Psa* NZ54  
274 successfully invaded from rare in both the endophytic and epiphytic environment,  
275 although the rate of invasion was reduced on the leaf surface. However, both epi-  
276 and endophytic population sizes were significantly reduced compared to single  
277 inoculations ( $P < 0.01$ , paired *t*-tests) (Figure 7). Despite the growing population of  
278 *Psa* NZ54, *P. syringae* G33C maintained the same epiphytic population size as when  
279 inoculated individually ( $P > 0.2$ , paired *t*-tests). The endophytic population size of *P.*  
280 *syringae* G33C increased ( $P < 0.01$ , 7dpi, paired *t*-test), which mirrored the results  
281 from the 1:1 competition experiments, where the presence of *Psa* NZ54 also had a  
282 positive effect on growth of *P. syringae* G33C.

283           In order to establish whether there was an advantage to being an early  
284 colonist, a time-stagger experiment was performed to see whether immigration  
285 history influences the interaction (Fukami *et al.*, 2007). ‘Hort16A’ plants were pre-  
286 inoculated with either of the two strains and followed by a subsequent inoculation  
287 of the other strain after three days. Early colonization provided no advantage to *Psa*  
288 NZ54 (Figure 8A), as *P. syringae* G33C maintained and established a stable  
289 population by 7 dpi and exhibited no significant difference in growth compared to  
290 individual growth ( $P > 0.3$ , paired *t*-tests). Reducing the secondary inoculation density  
291 resulted in a reduced initial population size at 3 and 7 dpi for *P. syringae* G33C ( $P$   
292  $< 0.05$ , paired *t*-tests), but by 10 dpi the level was the same as when the two strains  
293 were grown individually (Figure S7C).

294           When *P. syringae* G33C was the first colonist (Figure 8B) *Psa* NZ54 grew to  
295 the same population size by 7 dpi as compared to individually inoculated plants ( $P$   
296  $> 0.5$ , paired *t*-tests). The growth of *Psa* NZ54 was initially lower compared to  
297 individual growth when inoculated at a lower density ( $P < 0.05$ , paired *t*-tests), but  
298 this difference was no longer evident for the epiphytic population by 10 dpi (Figure  
299 S7B).

## 300 **DISCUSSION**

301           Studies of pathogen populations rarely take into consideration co-occurring  
302 commensal types and yet such types are likely to be important contributors to  
303 population structure and infection progress (Lindow and Brandl, 2003; Demba Diallo  
304 *et al.*, 2012; Bartoli *et al.*, 2015; Buonauro *et al.*, 2015; Rufián *et al.*, 2017). Here,

305 with focus on *P. syringae*, we have combined traditional population genetic  
306 approaches with experiments designed to investigate interactions among members  
307 of an ecologically cohesive population. The most significant findings include (i) a  
308 clonal population structure for commensal kiwifruit *P. syringae* (ii) strong association  
309 of genetic diversity with ecological factors, (iii) discovery of a new clade of kiwifruit-  
310 associated kiwifruit *P. syringae* within PG3 (PG3a) (Figure 2, Figure 3), (iv) complex  
311 interactions between the pathogenic *Psa* isolate and PG3a with evidence of a stable  
312 polymorphism under some *in vitro* conditions, but not *in planta* (Figure 4, Figure 6).

313 Overall, we found that *P. syringae* from kiwifruit display a clonal population  
314 structure, comprised of two clonal complexes and a small number of abundant STs.  
315 This sits in accord with earlier reports of clonal population structure for *P. syringae*,  
316 despite focus on pathogenic isolates which tend to undergo clonal expansion upon  
317 host specialisation (Sarkar and Guttman, 2004). Homologous recombination events  
318 are few and limited to within phylogroups for *P. syringae*, which is also supported by  
319 well-defined phylogenetic clades (Baltrus *et al.*, 2011; Bull *et al.*, 2011; Berge *et al.*,  
320 2014; Nowell *et al.*, 2016). A more fine-scale analysis of a collection of *Pseudomonas*  
321 *viridiflava* (now *P. syringae* PG7 and PG8 (Bartoli *et al.*, 2014; Berge *et al.*, 2014))  
322 isolated from *Arabidopsis thaliana* suggests that recombination at the phylogroup  
323 level is primarily within-clade rather than between clade (Goss *et al.*, 2005).

324 Genetic diversity varied according to ecological factors, most strikingly for *P.*  
325 *syringae* collected from infected orchards, where genetic diversity was highest. This  
326 may reflect effects of *Psa* on the kiwifruit immune response, which may facilitate  
327 migration of leaf colonists into the apoplast and vascular tissues and thus allow

328 access to water and nutrients. Such effects have been reported for infection of  
329 potatoes by *Pectobacterium atrosepticum* (Köiv *et al.*, 2015) and herbivore-damaged  
330 bitter cress leaves (*Cardamine cordifolia*) (Humphrey *et al.*, 2014), where in both  
331 instances *Pseudomonas* population densities and diversity increased following plant  
332 damage.

333 We observed differences in *P. syringae* genetic diversity that appear to be  
334 attributable to differences in plant genotypes. Host species and cultivar identity is  
335 known to significantly affect the composition of phyllosphere bacterial communities  
336 (Adams and Klopper, 2002; Van Overbeek and Van Elsas, 2008; Whipps *et al.*, 2008;  
337 Bodenhausen *et al.*, 2014; Laforest-Lapointe *et al.*, 2016; Wagner *et al.*, 2016).  
338 Differences in phyllosphere *P. syringae* diversity may also be influenced by  
339 environmental factors (such as humidity, nutrient availability or UV radiation) and  
340 orchard management practices. Different fertilizer and spray regimes (copper,  
341 antibiotics, Actigard™ and biological agents) are employed by growers to prevent or  
342 manage *Psa* infection throughout the growing season  
343 (<http://www.kvh.org.nz/vdb/document/99346>). These practices may have selected  
344 for copper and streptomycin resistance in *Psa* and kiwifruit epiphytes in NZ and  
345 elsewhere (Han *et al.*, 2003; Colombi *et al.*, 2017; Petriccione *et al.*, 2017).

346 Strains grouping with four major phylogroups (PG1, PG2, PG3, PG5) were  
347 recovered. This level of diversity in a cultivated environment is not surprising (Goss  
348 *et al.*, 2005; Bull *et al.*, 2011; Kniskern *et al.*, 2011; Beiki *et al.*, 2016; Hall *et al.*,  
349 2016). Two clades of endophytic *P. syringae* pv. *syringae* were recovered from  
350 symptomatic grapevines in Australia with pathogenic and non-pathogenic isolates



351 clustering together (Hall *et al.*, 2016). Samples obtained from citrus orchards  
352 suffering from citrus blast caused by *P. syringae* pv. *syringae* revealed isolates  
353 associated with PG2, PG7 and an unknown clade (Beiki *et al.*, 2016). Two distinct and  
354 highly divergent subclades of *Pseudomonas viridiflava* (*P. syringae* PG7) were  
355 recovered from a global sampling of wild *A. thaliana* (Goss *et al.*, 2005).

356           The newly recognised PG3a subclade of *P. syringae* appear to colonise  
357 kiwifruit leaves not only in NZ (dating back to 2010 (Visnovsky *et al.*, 2016)), but also  
358 in other kiwifruit growing regions of the world, including Japan (Tomihama *et al.*,  
359 2016) and China. Data from leaf samples indicate that PG3a is not displaced by *Psa*,  
360 but the total number of PG3a isolates collected is reduced in infected orchards.  
361 Interestingly the diversity of PG3a does not seem to be affected by infection status.  
362 Strains clustering with PG3a formed the majority (>50%) of kiwifruit isolates, and  
363 these have not yet been isolated from any other plant hosts recorded in PAMDB,  
364 with the exception of isolate 47L9, collected from tea leaves (*Camellia* sp.) growing  
365 in a former kiwifruit orchard. This indicates that PG3a forms a persistent association  
366 with kiwifruit plants – an observation that is further supported by the repeated  
367 isolation of PG3a from kiwifruit across large geographic distances, suggests that  
368 PG3a may have been coevolving with its host for some time. PG3a is thus also likely  
369 to be disseminated with the exchange of plant material (such as pollen or plant  
370 cuttings) between kiwifruit growing countries. The prevalence of PG3a in other  
371 kiwifruit growing countries (e.g. Korea, France or Italy) is at present unknown. The  
372 preferential occurrence of PG3 with woody hosts (Bartoli *et al.*, 2015; Nowell *et al.*,  
373 2016) could explain the particular grouping of the kiwifruit resident clade within

374 PG3. A similarly intriguing signal of host association was found in a collection of *P.*  
375 *syringae* isolates from *A. thaliana*, where PG2 representatives dominated (Kniskern  
376 *et al.*, 2011; Karasov *et al.*, 2017). Distinct lineages of non-pathogenic isolates have  
377 also been described for other plant pathogens such as *Xanthomonas arboricola*,  
378 where non-pathogenic strains are distant relatives of pathogenic lineages, despite  
379 being isolated from the same host (Essakhi *et al.*, 2015; Triplett *et al.*, 2015).

380           The kiwifruit commensal *P. syringae* G33C (representative of the PG3a  
381 subclade) successfully colonized the leaf surface and apoplast of kiwifruit without  
382 production of visible disease symptoms. This is reflected in the population size,  
383 which was reduced by 4-logs compared to pathogenic population size of *Psa* at 3 dpi.  
384 Similar population sizes have been reported for *P. syringae* pv. *phaseolicola*, which  
385 grows to a four-log higher population size on its host plant *Phaseolus vulgaris*  
386 compared to a non-pathogenic isolate; a 4-log reduction was also observed in  
387 resistant vs susceptible hosts (Omer and Wood, 1969; Young, 1974). Similar  
388 observations have been made for other plant pathogens, for example non-  
389 pathogenic *Xanthomonas* sp. displays a 4-log reduced growth compared to the  
390 disease-causing *X. oryzae* pv. *oryzae* (Triplett *et al.*, 2015). Bacterial population  
391 density appears to be directly related to the production of disease symptoms, as was  
392 demonstrated for environmental *P. syringae* strains inoculated in kiwifruit, which  
393 grew to near pathogen population size levels, but induced symptoms of disease  
394 (Bartoli *et al.*, 2015).

395           When grown in competition with *Psa* NZ54, *P. syringae* G33C population  
396 size increased. Studies exploring the dynamics of mixed infections have

397 demonstrated inoculum density-dependent effects on colonization (Young, 1974;  
398 Macho *et al.*, 2007). The ability of non-pathogenic *P. syringae* to colonize wider  
399 territories in the presence of a pathogenic strain was nicely demonstrated in a  
400 confocal microscopy study (Rufián *et al.*, 2017). It is possible that *P. syringae* G33C  
401 benefits from the virulence activity of *Psa* NZ54. T3SS-dependent hitch-hiking effects  
402 have been observed for *P. syringae* pv. *syringae* (Hirano *et al.*, 1999), however the  
403 increase in *P. syringae* G33C growth persists even in the absence of a functional T3SS  
404 in the pathogenic *Psa* strain. Virulence activities not encoded by the T3SS, such as  
405 phytotoxin production, may be responsible for this outcome.

406           Epiphytic and *in vitro* growth of *Psa* NZ54 was significantly reduced when  
407 co-inoculated with *P. syringae* G33C. Similarly, *Psa* growth may be suppressed by co-  
408 inoculation with environmental isolates of *P. syringae* (Bartoli *et al.*, 2015). Epiphytes  
409 may suppress pathogen growth either as direct antagonists or indirectly via resource  
410 competition (Wilson and Lindow, 1994). The specific mechanism by which *P.*  
411 *syringae* G33C suppresses *Psa* remains undetermined. The *Psa* NZ54 population  
412 collapse was delayed at 1:10 and 10:1 inoculation ratios, which suggests that this  
413 effect was due to the accumulation of antimicrobial compounds produced by *P.*  
414 *syringae* G33C. Phytotoxin production is widespread among fluorescent  
415 pseudomonads and some toxins have antimicrobial activity (Bender *et al.*, 1999),  
416 though contact-dependant growth inhibition (CDI) via Type 5 and 6 secretion  
417 systems or bacteriocins may also mediate *P. syringae* interactions (Hayes *et al.*,  
418 2010; Haapalainen *et al.*, 2012; Ruhe *et al.*, 2013; Hockett *et al.*, 2015).

419 Our in-depth localised sampling has revealed a global association of PG3a  
420 with kiwifruit. Additionally we have shown that this clade of non-pathogenic *P.*  
421 *syringae* engage in complex interactions with pathogenic *Psa*. This highlights the  
422 value of understanding genotypic diversity and ecological interactions among  
423 pathogens and non-pathogens in field settings. Clarifying how commensals persist in  
424 association with specific hosts over long periods without causing disease and the  
425 mechanism by which they modulate pathogen invasion and proliferation will  
426 contribute to a fuller understanding of plant-microbe interactions.

## 427 **EXPERIMENTAL PROCEDURES**

### 428 **Plant tissue collection and bacterial isolation**

429 The sampling scheme was designed to obtain strains from *Psa* infected and  
430 uninfected hosts, irrespective of disease stage (symptom development) or  
431 pathogenicity potential of the isolate. *P. syringae* was isolated from the leaf surfaces  
432 of two different cultivars of *Actinidia chinensis*: *A. chinensis* var. *chinensis* Hort16A  
433 (gold) and *A. chinensis* var. *deliciosa* Hayward (green), which vary in their  
434 susceptibility to *Psa*: 'Hort16A' is more susceptible than the green 'Hayward'  
435 (Ferrante and Scortichini, 2010; Cameron and Sarojini, 2014). One infected and one  
436 uninfected orchard of each variety was sampled by collecting three leaves from six  
437 separate vines along a diagonal path of ~400m (Table S1). Sampling occurred at  
438 three intervals during the growing season: spring (after bud break), summer and  
439 autumn (prior to harvest). Vine trunks and canes (secondary branches) were tagged  
440 to ensure resampling of the same spot. Some 'Hort16A' canes were removed during

441 routine disease management; neighbouring canes on the same vine were then  
442 sampled and tagged. All uninfected Hayward vines were cut down prior to the last  
443 sampling day so the adjoining block of Hayward was sampled instead. The location of  
444 each sampled orchard is listed in Table S2.

445 Leaves were individually placed in 50 mL conical centrifuge tubes and washed  
446 with 40 mL 10mM MgSO<sub>4</sub> buffer supplemented with 0.2 % Tween (Invitrogen, US) by  
447 alternately shaking and vortexing at slow speed for 3 min. After removing the leaf,  
448 the leaf wash was centrifuged at 4600 rpm for 10 min. The supernatant was  
449 removed and the pellet was resuspended in 200 µL 10mM MgSO<sub>4</sub>. 100 µL of the  
450 resuspension was stored at -80°C and 100 µL was plated on *Pseudomonas* agar base  
451 (Oxoid, UK) supplemented with 10 mg/L ceftrimide, 10 mg/L fucidin and 50 mg/L  
452 cephalosporin (CFC supplement, Oxoid, UK). For each leaf two isolates exhibiting *P.*  
453 *syringae* colony morphology (round, creamy white) were selected randomly from  
454 the plate and restreaked, then used to inoculate liquid overnight cultures for storage  
455 at -80°C. Isolates were tested for the absence of cytochrome *C* oxidase using  
456 Bactident Oxidase strips (Merck KgaA, Germany), characteristic of *P. syringae*. A total  
457 of 148 *P. syringae* isolates were obtained from the four orchards (Table S1).

#### 458 **PCR amplification & sequencing**

459 A lysate was prepared for each isolate by resuspending a colony in 100 µL ddH<sub>2</sub>O and  
460 lysing the cells at 96°C for 10 min. Strains were sequenced using the Hwang *et al.*  
461 (2005) MLST scheme for four housekeeping genes *gapA*, *gyrB*, *gltA* (=cts) and *rpoD*  
462 (reverse). Due to amplification problems, the forward primer for *rpoD* from Sarkar  
463 and Guttman (2004) was used. PCR amplification was performed with a BIO-RAD

464 T100 Thermal Cycler following an adapted protocol of Hwang et al. (2005): a total  
465 reaction volume of 50  $\mu$ l with a final concentration of 1x PCR buffer (Invitrogen, US),  
466 1  $\mu$ M for each primer, 0.2 mM dNTP's (Bioline, UK), 1 U Taq Polymerase (Invitrogen,  
467 US), 1  $\mu$ l lysed bacterial cells, 2% DMSO (Sigma-Aldrich, US) and 1.5 mM MgCl<sub>2</sub>. Initial  
468 denaturation was at 94°C for 2 min, followed by 30 cycles of amplification with  
469 denaturation at 94°C for 30 s, annealing at 63°C for 30 s and elongation at 72°C for  
470 1 min. Final elongation was for 3 min at 72°C. Samples were purified using the Exo-  
471 CIP method and sequenced by MacroGen Inc (South Korea). Sequence analysis was  
472 performed with Geneious v7.1.7 (Kearse *et al.*, 2012). Sequences were trimmed to  
473 the same length (476 bp *gap1*, 507 bp *gyrB*, 529 bp *gltA*, 498 bp *rpoD*) and  
474 concatenated (2010 bp) (GenBank accession numbers: *gapA* MG642149 -  
475 MG642296; *gyrB* MG642297 - MG642444; *gltA* MG642445 - MG642592; *rpoD*  
476 MG642593 - MG642740).

## 477 **Population genetics**

### 478 *Sequence diversity indices*

479 A rarefaction analysis was performed using MOTHUR v.1.34.4 by subsampling  
480 using 1,000 iterations (Schloss *et al.*, 2009). Pairwise genetic distances between  
481 isolates were calculated and sequences assigned to Operational Taxonomic Units  
482 (OTUs) based on the corresponding average pairwise genetic distance of each group.

483 Simpson's index of diversity (D) and evenness (ED) ( $\alpha$ -diversity) and  
484 Sørensen's index of dissimilarity ( $\beta$ -diversity) were calculated using the *vegan*  
485 package (Oksanen *et al.*, 2016) in R v3.3.1 (R.Core.Team, 2016). Simpson's D was

486 converted to the effective number of species ( $D_e$ ) in order to account for the non-  
487 linear properties of Simpson's index of diversity (Jost, 2006).

#### 488 *Multilocus Sequence Typing*

489 Sequence types (STs) sharing three out of four alleles (SLV, single locus  
490 variants) were grouped using eBURST v3 (bootstrapped with 1,000,000 resamplings)  
491 (Feil *et al.*, 2004; Spratt *et al.*, 2004). A Minimum Spanning Tree providing an  
492 overview of triple locus variants was constructed using Phyloviz v2.0 (Francisco *et al.*,  
493 2012).

494 165 non-redundant ST profiles of *P. syringae* strains were downloaded from  
495 the Plant Associated and Environmental Microbes Database (PAMDB,  
496 <http://genome.ppws.vt.edu/cgi-bin/MLST/home.pl>) (Almeida *et al.*, 2010). *P.*  
497 *syringae* sequences isolated recently from kiwifruit and air in Japan (Tomihama *et*  
498 *al.*, 2016) and kiwifruit isolates from NZ, France and the United States (Visnovsky *et*  
499 *al.*, 2016) were also included. A reduced set of 37 *P. syringae* isolates representing  
500 the different monophyletic groups of *P. syringae*, as well as the Japanese kiwifruit  
501 strains and the US, France and NZ kiwifruit isolates from previous years were used to  
502 provide better resolution in the phylogenies displayed in Figure 2 and Figure S4.

#### 503 *Sequence diversity and recombination*

504 START2 (v0.9.0 beta) was employed to calculate parameters of genetic  
505 diversity, number of alleles and polymorphic sites, GC content and the ratio of non-  
506 synonymous to synonymous substitutions ( $d_N/d_S$  ratio) (Jolley *et al.*, 2001). The  
507 number of mutations and amino acid changes and nucleotide diversity parameter  $\pi$

508 were calculated with DnaSP v. 5.10.1 (Rozas and Rozas, 1995). Jmodeltest 2.1.7  
509 (Guindon and Gascuel, 2003; Darriba *et al.*, 2012) was used with default parameter  
510 settings to find the best-fitting evolutionary model. Pairwise genetic variability  
511 among and between phylogroups was calculated using MEGA7 (Kumar *et al.*, 2016).

512 To test whether genetic diversity varied by sampling location, time of  
513 sampling, orchard infection status and/or cultivar, a permutational multivariate  
514 analysis of variance (PERMANOVA) (Anderson, 2001; McArdle and Anderson, 2001)  
515 was performed using PRIMER v 6.1.12 (PRIMER-E Ltd., Plymouth, UK, PERMANOVA+  
516 add-on v. 1.0.2.). Pairwise distances among unique STs were used as input and tests  
517 were run with 9999 permutations.

518 LDHAT v2.2a (Auton and McVean, 2007) was used to estimate the rate of  
519 mutation (Watterson's  $\theta$ ) and recombination ( $\rho$ ) using the composite likelihood  
520 method of Hudson (Hudson, 2001) with an adaption to finite-site models. Only  
521 polymorphic sites with two alleles were included and the frequency cut-off for  
522 missing data was set to 0.2.

### 523 *Phylogenetic reconstruction*

524 Trees were built using single representatives of each unique ST from this  
525 study to improve readability of the tree. TREEPUZZLE v5.3 (Schmidt *et al.*, 2002) was  
526 used to construct maximum likelihood (ML) trees using the best-fitting evolutionary  
527 model (jModeltest) for individual genes and the concatenated alignment (100,000  
528 puzzling steps). Dnaml (PHYLIP v3.695, Felsenstein 1989) was used to test for



529 congruence between single trees (SH-test) using default parameters, providing ML  
530 trees as input and a random number seed of 333.

### 531 **Strains and culture conditions**

532 A list of all bacterial strains used in this study can be found in Table S2.  
533 *Pseudomonas* strains were cultured in King's B or minimal M9 media at 28°C and *E.*  
534 *coli* was cultured in Luria Bertani medium at 37°C. Liquid overnight cultures were  
535 inoculated from single colonies and shaken at 250 rpm for 16 hrs. The antibiotics  
536 kanamycin (kan) and nitrofurantoin (nf) were used at a concentration of 50 µg/ml.  
537 Kanamycin resistant *Psa* NZ54 and *Psa* NZ13  $\Delta hrcC$  were employed in all *in vitro* and  
538 *in planta* experiments.

### 539 **Mutant development**

540 *Psa* NZ13 $\Delta hrcC$  was constructed by in-frame deletion of *hrcC* via marker  
541 exchange mutagenesis. Knockout construct was generated by overlap extension PCR  
542 (Ho *et al.*, 1989) using the primers listed in Table S6. DNA was amplified from *Psa*  
543 NZ13 with Phusion® High-Fidelity DNA polymerase. The deletion construct was  
544 inserted into pK18mobsacB (Schäfer *et al.*, 1994). The recombinant vector was  
545 transferred into *Psa* NZ13 via triparental mating, using as helper *E. coli* DH5 $\alpha$  strain  
546 containing pRK2013. Mutants were selected by plating on KB kanamycin (50 µg/mL)  
547 and subsequently on KB containing 5% sucrose. Mutants were screened by PCR using  
548 external primers (Table S6) and the deletion was then confirmed by sequencing.

549 Triparental matings were performed to introduce a kanamycin resistant Tn5  
550 transposon into *Psa* NZ54 and *Psa* NZ13  $\Delta hrcC$ . *E. coli* S17-1 Tn5*hah Sgid1* (donor)

551 (Zhang *et al.*, 2015), *E. coli pRK2013* (helper) (Ditta *et al.*, 1980) and *Psa* NZ54 or *Psa*  
552 NZ13  $\Delta hrcC$  (recipient) were grown in shaken liquid media overnight. 200  $\mu$ l of donor  
553 and helper and 2mL of recipient were individually washed, pelleted and combined in  
554 30  $\mu$ l 10 mM  $MgCl_2$ . The mixture was plated on a pre-warmed LB agar plate and  
555 incubated at 28°C for 24 hrs. The cells were scraped off and resuspended in 1 mL 10  
556 mM  $MgCl_2$  and plated on KB plates supplemented with kanamycin and  
557 nitrofurantoin. Bacterial growth was compared to the wild type recipient in both KB  
558 and M9 media to ensure marker introduction did not result in a loss of fitness.

## 559 **Competition assays**

### 560 *In vitro* competition assays

561 Competition experiments were performed *in vitro* using rich (King's B) and  
562 minimal (M9) media in a shaken and static environment. Competition experiments  
563 were performed in 1:1, 1:10 and 10:1 ratios for each of the four assay conditions.  
564 Liquid overnight cultures of each strain in KB were established from single colony  
565 inoculations. 30 mL vials with 4 mL of the appropriate media were inoculated with  
566 each strain, adjusted to a founding density of either  $5 \times 10^6$  cfu  $ml^{-1}$  ( $OD_{600}$  0.006) or  
567  $4 \times 10^4$  cfu  $ml^{-1}$  ( $OD_{600}$  0.0004). Control vials were inoculated with a single strain,  
568 adjusted to  $5 \times 10^6$  cfu  $ml^{-1}$ . Cultures were incubated at 28°C and grown over a period  
569 of 72 hrs, either still or shaken at 250rpm. Bacterial density was calculated at 0, 24,  
570 48 and 72 hrs by plating dilutions on KB kan and M9 agar plates to distinguish  
571 between competing strains. The experiment was performed using three replicates  
572 and repeated three times.

573 *In planta competition and pathogenicity assays*

574 Epiphytic and endophytic growth of *Psa* NZ54, *Psa* NZ13  $\Delta hrcC$  and *P.*  
575 *syringae* G33C was evaluated on 4-week old kiwifruit plantlets using single and  
576 mixed-culture inoculation. Clonally propagated *A. chinensis* var. *chinensis* 'Hort16A'  
577 and 'SunGold' were grown for a minimum of one month in a Conviron CMP6010  
578 growth cabinet at 21°C with a 14/10 hr light/dark cycle and 70% humidity. Bacterial  
579 strains were incubated for two days at 28°C on KB plates, after which they were  
580 resuspended in 10 mM MgSO<sub>4</sub> buffer. Mixed inoculum (1:1, 1:100 and 100:1) was  
581 prepared in 50 mL 10 mM MgSO<sub>4</sub> buffer and 0.002% Silwet-70 (surfactant), with  
582 strains adjusted to 8x10<sup>7</sup> cfu ml<sup>-1</sup> (OD<sub>600</sub> 0.1) or 8x10<sup>5</sup> cfu ml<sup>-1</sup> (OD<sub>600</sub> 0.001). Single  
583 strain plant inoculations were also performed using an initial 8x10<sup>7</sup> cfu ml<sup>-1</sup> (OD<sub>600</sub>  
584 0.1).

585 Plants were inoculated by submerging leaves in the inoculum for 5 s and  
586 allowing to air-dry. Plants were returned to the growth cabinet and watered every  
587 second day. Bacterial density was assessed at either 0, 2, 4, 7 and 10 days post  
588 inoculation (dpi) or 0, 3, and 7 dpi ( $\Delta hrcC$  competition experiments). Epiphytic  
589 growth was assessed by placing inoculated leaves in separate sterile plastic bags  
590 with 35 mL 10 mM MgSO<sub>4</sub> buffer and shaking manually for 3 minutes. The leaf wash  
591 was centrifuged at 4600 rpm for 3 min and the supernatant discarded. Bacteria were  
592 resuspended in 200  $\mu$ l buffer and serial dilutions plated on M9 and KB+kan agar  
593 plates.

594 Endophytic growth was assessed by removing one 1cm<sup>2</sup> leaf disk per plant  
595 (including the midrib), surface sterilizing in 70% EtOH for 30 sec, drying and

596 homogenising for 1 minute in a 1.5 mL Eppendorf tube containing 200 µl buffer and  
597 two metal beads with the TissueLyser II (QIAGEN). The plant homogenate was  
598 serially diluted and plated on M9 and KB+kan agar plates. All experiments were  
599 performed in duplicate, with at least 4 replicates per experiment.

## 600 **Statistical analysis**

601 A Student's *t*-test was used to verify the statistical difference where  
602 applicable. For non-normally distributed data with unequal variance, the Mann  
603 Whitney U test was performed.

604 The fitness of each strain in the competition experiments is expressed as the  
605 Malthusian parameter (Lenski *et al.*, 1991). The Malthusian parameter was  
606 calculated as  $M = (\ln(N1_f1/N1_i))/(\ln(N2_f/N2_i))$ , where  $N1_i$  is initial number of  
607 cfu of strain 1 at 0h and  $N1_f$  cfu after 24 hrs (*in vitro*) or 2/3 dpi (*in planta*,  
608 'Hort16A'/'SunGold').

## 609 **BIOSECURITY AND APPROVAL**

610 All worked was performed in approved facilities and in accord with APP201675,  
611 APP201730, APP202231.

## 612 **ACKNOWLEDGEMENTS**

613 We want to particularly thank kiwifruit growers David French, Rex Reed and Bruce  
614 and Fiona Aitken for granting access to their orchards. The work conducted was  
615 supported the New Zealand Ministry for Business, Innovation and Employment

616 (C11X1205). Christina Straub was supported through a PhD scholarship from the  
617 New Zealand Institute for Advanced Studies (NZIAS) and Plant & Food Research.

## 618 REFERENCES

- 619 Abelleira, A., López, M.M., Peñalver, J., Aguín, O., Mansilla, J.P., Picoaga, A., and  
620 García, M.J. (2011) First report of bacterial canker of kiwifruit Caused by  
621 *Pseudomonas syringae* pv. *actinidiae* in Spain. *Plant Dis.* **95**: 1583.
- 622 Adams, P.D. and Kloepper, J.W. (2002) Effect of host genotype on indigenous  
623 bacterial endophytes of cotton (*Gossypium hirsutum* L.). *Plant Soil* **240**: 181–  
624 189.
- 625 Almeida, N.F., Yan, S., Cai, R., Clarke, C.R., Morris, C.E., Schaad, N.W., et al. (2010)  
626 PAMDB, a multilocus sequence typing and analysis database and website for  
627 plant-associated microbes. *Phytopathology* **100**: 208–215.
- 628 Anderson, M.J. (2001) A new method for non parametric multivariate analysis of  
629 variance. *Austral Ecol.* **26**: 32–46.
- 630 Auton, A. and McVean, G. (2007) Recombination rate estimation in the presence of  
631 hotspots. *Genome Res.* **17**: 1219–1227.
- 632 Balestra, G.M., Mazzaglia, A., Spinelli, R., Graziani, S., Quattrucci, A., and Rossetti, A.  
633 (2008) Cancro batterico su *Actinidia chinensis*. *L'informatore Agrar.* **38**: 75–76.
- 634 Baltrus, D.A., Nishimura, M.T., Romanchuk, A., Chang, J.H., Mukhtar, M.S., Cherkis,  
635 K., et al. (2011) Dynamic evolution of pathogenicity revealed by sequencing and  
636 comparative genomics of 19 *Pseudomonas syringae* isolates. *PLoS Pathog.* **7**:  
637 e1002132.
- 638 Bartoli, C., Berge, O., Monteil, C.L., Guilbaud, C., Balestra, G.M., Varvaro, L., et al.  
639 (2014) The *Pseudomonas viridiflava* phylogroups in the *P. syringae* species  
640 complex are characterized by genetic variability and phenotypic plasticity of  
641 pathogenicity-related traits. *Environ. Microbiol.* **16**: 2301–2315.
- 642 Bartoli, C., Lamichhane, J.R., Berge, O., Guilbaud, C., Varvaro, L., Balestra, G.M., et al.  
643 (2015) A framework to gauge the epidemic potential of plant pathogens in  
644 environmental reservoirs: the example of kiwifruit canker. *Mol. Plant Pathol.*  
645 **16**: 137–49.
- 646 Beiki, F., Busquets, A., Gomila, M., Rahimian, H., Lalucat, J., and García-Valdés, E.  
647 (2016) New *Pseudomonas* spp. are pathogenic to citrus. *PLoS One* **11**:  
648 e0148796.
- 649 Bender, C.L., Alarcon-Chaidez, F., Gross, D.C., Alarcón-Chaidez, F., and Gross, D.C.  
650 (1999) *Pseudomonas syringae* phytotoxins: Mode of action, regulation, and  
651 biosynthesis by peptide and polyketide synthetases. *Microbiol. Mol. Biol. Rev.*  
652 **63**: 266–292.
- 653 Berge, O., Monteil, C.L., Bartoli, C., Chandeysson, C., Guilbaud, C., Sands, D.C., and  
654 Morris, C.E. (2014) A user's guide to a data base of the diversity of  
655 *Pseudomonas syringae* and its application to classifying strains in this  
656 phylogenetic complex. *PLoS One* **9**: e105547.
- 657 Berlec, A. (2012) Novel techniques and findings in the study of plant microbiota:

- 658 Search for plant probiotics. *Plant Sci.* **193–194**: 96–102.
- 659 Bodenhausen, N., Bortfeld-Miller, M., Ackermann, M., and Vorholt, J.A. (2014) A  
660 Synthetic Community Approach Reveals Plant Genotypes Affecting the  
661 Phyllosphere Microbiota. *PLoS Genet.* **10**: e1004283.
- 662 Bratcher, H.B., Corton, C., Jolley, K.A., Parkhill, J., and Maiden, M.C. (2014) A gene-  
663 by-gene population genomics platform: de novo assembly, annotation and  
664 genealogical analysis of 108 representative *Neisseria meningitidis* genomes.  
665 *BMC Genomics* **15**: 1138.
- 666 Bull, C.T., Clarke, C.R., Cai, R., Vinatzer, B.A., Jardini, T.M., and Koike, S.T. (2011)  
667 Multilocus sequence typing of *Pseudomonas syringae* sensu lato confirms  
668 previously described genomospecies and permits rapid identification of *P.*  
669 *syringae* pv. *coriandricola* and *P. syringae* pv. *apii* causing bacterial leaf spot on  
670 parsley. *Phytopathology* **101**: 847–858.
- 671 Buonauro, R., Moretti, C., da Silva, D.P., Cortese, C., Ramos, C., and Venturi, V.  
672 (2015) The olive knot disease as a model to study the role of interspecies  
673 bacterial communities in plant disease. *Front. Plant Sci.* **6**: 1–12.
- 674 Cameron, A. and Sarojini, V. (2014) *Pseudomonas syringae* pv. *actinidiae*: chemical  
675 control, resistance mechanisms and possible alternatives. *Plant Pathol.* **63**:.  
676
- 677 Caugant, D.A. and Maiden, M.C.J. (2009) Meningococcal carriage and disease—  
678 Population biology and evolution. *Vaccine* **27**: B64–B70.
- 679 Colombi, E., Straub, C., Künzel, S., Templeton, M.D., McCann, H.C., and Rainey, P.B.  
680 (2017) Evolution of copper resistance in the kiwifruit pathogen *Pseudomonas*  
681 *syringae* pv. *actinidiae* through acquisition of integrative conjugative elements  
682 and plasmids. *Environ. Microbiol.* **19**: 819–832.
- 683 Cordero, O.X., Wildschutte, H., Kirkup, B., Proehl, S., Ngo, L., Hussain, F., et al. (2012)  
684 Ecological Populations of Bacteria Act as Socially Cohesive Units of Antibiotic  
685 Production and Resistance. *Science (80-. )*. **337**: 1228–1231.
- 686 Darriba, D., Taboada, G.L., Doallo, R., and Posada, D. (2012) jModelTest 2: more  
687 models, new heuristics and parallel computing. *Nat. Methods* **9**: 772–772.
- 688 Demba Diallo, M., Monteil, C.L., Vinatzer, B.A., Clarke, C.R., Glaux, C., Guilbaud, C., et  
689 al. (2012) *Pseudomonas syringae* naturally lacking the canonical type III  
690 secretion system are ubiquitous in nonagricultural habitats, are phylogenetically  
691 diverse and can be pathogenic. *ISME J.* **6**: 1325–1335.
- 692 Ditta, G., Stanfield, S., Corbin, D., and Helinski, D.R. (1980) Broad host range DNA  
693 cloning system for gram-negative bacteria: construction of a gene bank of  
694 *Rhizobium meliloti*. *Proc. Natl. Acad. Sci.* **77**: 7347–7351.
- 695 Essakhi, S., Cesbron, S., Fischer-Le Saux, M., Bonneau, S., Jacques, M.A., and  
696 Manceau, C. (2015) Phylogenetic and variable-number tandem-repeat analyses  
697 identify nonpathogenic *Xanthomonas arboricola* lineages lacking the canonical  
698 type III secretion system. *Appl. Environ. Microbiol.* **81**: 5395–5410.
- 699 Everett, K.R., Taylor, R.K., Romberg, M.K., Rees-George, J., Fullerton, R.A., Vanneste,  
700 J.L., and Manning, M.A. (2011) First report of *Pseudomonas syringae* pv.  
701 *actinidiae* causing kiwifruit bacterial canker in New Zealand. *Australas. Plant*  
702 *Dis. Notes* **6**: 67–71.
- 703 Feil, E.J., Li, B.C., Aanensen, D.M., Hanage, W.P., and Spratt, B.G. (2004) eBURST:  
704 inferring patterns of evolutionary descent among clusters of related bacterial  
genotypes from Multilocus Sequence Typing Data. *J. Bacteriol.* **186**: 1518–1530.

- 705 Felsenstein, J. (1989) Phylip: phylogeny inference package (version 3.2). *Cladistics* **5**:  
706 164–166.
- 707 Ferrante, P. and Scortichini, M. (2010) Molecular and phenotypic features of  
708 *Pseudomonas syringae* pv. *actinidiae* isolated during recent epidemics of  
709 bacterial canker on yellow kiwifruit (*Actinidia chinensis*) in central Italy. *Plant*  
710 *Pathol.* **59**: 954–962.
- 711 Francisco, A.P., Vaz, C., Monteiro, P.T., Melo-Cristino, J., Ramirez, M., and Carriço,  
712 J.A. (2012) PHYLOViZ: phylogenetic inference and data visualization for  
713 sequence based typing methods. *BMC Bioinformatics* **13**: 87.
- 714 Fraser, C., Hanage, W.P., and Spratt, B.G. (2005) Neutral microepidemic evolution of  
715 bacterial pathogens. *Proc. Natl. Acad. Sci.* **102**: 1968–1973.
- 716 Fujikawa, T. and Sawada, H. (2016) Genome analysis of the kiwifruit canker pathogen  
717 *Pseudomonas syringae* pv. *actinidiae* biovar 5. *Sci. Rep.* **6**:.
- 718 Fukami, T., Beaumont, H.J.E., Zhang, X.-X., and Rainey, P.B. (2007) Immigration  
719 history controls diversification in experimental adaptive radiation. *Nature* **446**:  
720 436–439.
- 721 Goss, E.M., Kreitman, M., and Bergelson, J. (2005) Genetic diversity, recombination  
722 and cryptic clades in *Pseudomonas viridiflava* infecting natural populations of  
723 *Arabidopsis thaliana*. *Genetics* **169**: 21–35.
- 724 Guindon, S. and Gascuel, O. (2003) A simple, fast, and accurate algorithm to estimate  
725 large phylogenies by maximum likelihood. *Syst. Biol.* **52**: 696–704.
- 726 Haapalainen, M., Mosorin, H., Dorati, F., Wu, R.F., Roine, E., Taira, S., et al. (2012)  
727 Hcp2, a secreted protein of the phytopathogen *Pseudomonas syringae* pv.  
728 tomato DC3000, is required for fitness for competition against bacteria and  
729 yeasts. *J. Bacteriol.* **194**: 4810–4822.
- 730 Hall, S.J., Dry, I.B., Blanchard, C.L., and Whitelaw-Weckert, M.A. (2016) Phylogenetic  
731 relationships of *Pseudomonas syringae* pv. *syringae* isolates associated with  
732 bacterial inflorescence rot in grapevine. *Plant Dis.* **100**: 607–616.
- 733 Han, H.S., Nam, H.Y., Koh, Y.J., Hur, J.-S., and Jung, J.S. (2003) Molecular bases of  
734 high-level streptomycin resistance in *Pseudomonas marginalis* and  
735 *Pseudomonas syringae* pv. *actinidiae*. *J. Microbiol.* **41**: 16–21.
- 736 Haubold, B. and Rainey, P.B. (1996) Genetic and ecotypic structure of a fluorescent  
737 *Pseudomonas* population. *Mol. Ecol.* **5**: 747–761.
- 738 Hayes, C.S., Aoki, S.K., and Low, D.A. (2010) Bacterial contact-dependent delivery  
739 systems. *Annu. Rev. Genet.* **44**: 71–90.
- 740 Hernández-Morales, A., De la Torre-Zavala, S., Ibarra-Laclette, E., Hernández-Flores,  
741 J., Jofre-Garfias, A., Martínez-Antonio, A., and Álvarez-Morales, A. (2009)  
742 Transcriptional profile of *Pseudomonas syringae* pv. *phaseolicola* NPS3121 in  
743 response to tissue extracts from a susceptible *Phaseolus vulgaris* L. cultivar.  
744 *BMC Microbiol.* **9**: 257.
- 745 Hibbing, M.E., Fuqua, C., Parsek, M.R., and Peterson, S.B. (2010) Bacterial  
746 competition: surviving and thriving in the microbial jungle. *Nat. Rev. Microbiol.*  
747 **8**: 15–25.
- 748 Hirano, S.S., Charkowski, A.O., Collmer, A., Willis, D.K., and Upper, C.D. (1999) Role of  
749 the Hrp type III protein secretion system in growth of *Pseudomonas syringae*  
750 pv. *syringae* B728a on host plants in the field. *Proc. Natl. Acad. Sci.* **96**: 9851–  
751 9856.

- 752 Hirano, S.S. and Upper, C.D. (2000) Bacteria in the leaf ecosystem with emphasis on  
753 *Pseudomonas syringae* - a pathogen, ice nucleus, and epiphyte. *Microbiol. Mol.*  
754 *Biol. Rev.* **64**: 624–653.
- 755 Ho, S.N., Hunt, H.D., Horton, R.M., Pullen, J.K., and Pease, L.R. (1989) Site-directed  
756 mutagenesis by overlap extension using the polymerase chain reaction. *Gene*  
757 **77**: 51–59.
- 758 Hockett, K.L., Renner, T., and Baltrus, D.A. (2015) Independent co-option of a tailed  
759 bacteriophage into a killing complex in *Pseudomonas*. *MBio* **6**: 1–11.
- 760 Hudson, R.R. (2001) Two-locus sampling distributions and their application. *Genetics*  
761 **159**: 1805–1817.
- 762 Humphrey, P.T., Nguyen, T.T., Villalobos, M.M., and Whiteman, N.K. (2014) Diversity  
763 and abundance of phyllosphere bacteria are linked to insect herbivory. *Mol.*  
764 *Ecol.* **23**: 1497–1515.
- 765 Hwang, M.S.H., Morgan, R.L., Sarkar, S.F., Wang, P.W., and Guttman, D.S. (2005)  
766 Phylogenetic characterization of virulence and resistance phenotypes of  
767 *Pseudomonas syringae*. *Appl. Environ. Microbiol.* **71**: 5182–5191.
- 768 Istock, C.A., Duncan, K.E., Ferguson, N., and Zhou, X. (1992) Sexuality in a natural  
769 population of bacteria - *Bacillus subtilis* challenges the clonal paradigm. *Mol.*  
770 *Ecol.* **1**: 95–103.
- 771 Jolley, K.A., Feil, E.J., Chan, M.S., and Maiden, M.C. (2001) Sequence type analysis  
772 and recombinational tests (START). *Bioinformatics* **17**: 1230–1231.
- 773 Jost, L. (2006) Entropy and diversity. *Oikos* **113**: 363–375.
- 774 Karasov, T.L., Barrett, L., Hershberg, R., and Bergelson, J. (2017) Similar levels of gene  
775 content variation observed for *Pseudomonas syringae* populations extracted  
776 from single and multiple host species. *PLoS One* **12**: 1–18.
- 777 Kearse, M., Moir, R., Wilson, A., Stones-Havas, S., Cheung, M., Sturrock, S., et al.  
778 (2012) Geneious Basic: An integrated and extendable desktop software  
779 platform for the organization and analysis of sequence data. *Bioinformatics* **28**:  
780 1647–1649.
- 781 Kniskern, J.M., Barrett, L.G., and Bergelson, J. (2011) Maladaptation in wild  
782 populations of the generalist plant pathogen *Pseudomonas syringae*. *Evolution*  
783 (N. Y.) **65**: 818–830.
- 784 Koh, Y.J., Kim, G.H., Koh, H.S., Lee, Y.S., Kim, S.C., and Jung, J.S. (2012) Occurrence of  
785 a new type of *Pseudomonas syringae* pv. *actinidiae* strain of bacterial canker on  
786 kiwifruit in Korea. *Plant Pathol.* **28**: 423–427.
- 787 Kõiv, V., Roosaare, M., Vedler, E., Ann Kivistik, P., Toppi, K., Schryer, D.W., et al.  
788 (2015) Microbial population dynamics in response to *Pectobacterium*  
789 *atrosepticum* infection in potato tubers. *Sci. Rep.* **5**: 11106.
- 790 Kumar, S., Stecher, G., and Tamura, K. (2016) MEGA7: Molecular Evolutionary  
791 Genetics Analysis version 7.0 for bigger datasets. *Mol. Biol. Evol.* **33**: 1870–1874.
- 792 Laforest-Lapointe, I., Messier, C., Kembel, S.W., Lindow, S., Brandl, M., Herre, E., et  
793 al. (2016) Host species identity, site and time drive temperate tree phyllosphere  
794 bacterial community structure. *Microbiome* **4**: 27.
- 795 Lamichhane, J.R. and Venturi, V. (2015) Synergisms between microbial pathogens in  
796 plant disease complexes: a growing trend. *Front. Plant Sci.* **6**: 385.
- 797 Lenski, R.E., Rose, M.R., Simpson, S.C., and Tadler, S.C. (1991) Long-term  
798 experimental evolution in *Escherichia coli*. I. Adaptation and divergence during



- 799 2,000 generations. *Am. Nat.* **138**: 1315–1341.
- 800 Lindow, S.E. (1986) Construction of isogenic Ice strains of *Pseudomonas syringae* for  
801 evaluation of specificity of competition on leaf surfaces. *Perspect. Microb. Ecol.*  
802 *Slov. Soc. Microbiol. Ljubljana* 509–515.
- 803 Lindow, S.E. and Brandl, M.T. (2003) Microbiology of the phyllosphere. *Appl. Environ.*  
804 *Microbiol.* **69**: 1875–1883.
- 805 Macho, A.P., Zumaquero, A., Ortiz-Martín, I., and Beuzón, C.R. (2007) Competitive  
806 index in mixed infections: A sensitive and accurate assay for the genetic analysis  
807 of *Pseudomonas syringae*-plant interactions. *Mol. Plant Pathol.* **8**: 437–450.
- 808 Marchi, G., Sisto, A., Cimmino, A., Andolfi, A., Cipriani, M.G., Evidente, A., and Surico,  
809 G. (2006) Interaction between *Pseudomonas savastanoi* pv. *savastanoi* and  
810 *Pantoea agglomerans* in olive knots. *Plant Pathol.* **55**: 614–624.
- 811 Maynard Smith, J., Smith, N.H., O'Rourke, M., and Spratt, B.G. (1993) How clonal are  
812 bacteria? *Proc. Natl. Acad. Sci.* **90**: 4384–4388.
- 813 McArdle, B.H. and Anderson, M.J. (2001) Fitting multivariate models to community  
814 data: a comment on distance-based redundancy analysis. *Ecology* **82**: 290–297.
- 815 McCann, H.C., Li, L.L., Liu, Y., Li, D., Pan, H., Zhong, C., et al. (2017) Origin and  
816 evolution of the kiwifruit canker pandemic. *Genome Biol. Evol.* **9**: 932–944.
- 817 McCann, H.C., Rikkerink, E.H.A., Bertels, F., Fiers, M., Lu, A., Rees-George, J., et al.  
818 (2013) Genomic analysis of the kiwifruit pathogen *Pseudomonas syringae* pv.  
819 *actinidiae* provides insight into the origins of an emergent plant disease. *PLoS*  
820 *Pathog.* **9**: e1003503.
- 821 Mohr, T.J., Liu, H., Yan, S., Morris, C.E., Castillo, J.A., Jelenska, J., and Vinatzer, B.A.  
822 (2008) Naturally occurring nonpathogenic isolates of the plant pathogen  
823 *Pseudomonas syringae* lack a type III secretion system and effector gene  
824 orthologues. *J. Bacteriol.* **190**: 2858–2870.
- 825 Monier, J.-M. and Lindow, S.E. (2003) Differential survival of solitary and aggregated  
826 bacterial cells promotes aggregate formation on leaf surfaces. *Proc. Natl. Acad.*  
827 *Sci.* **100**: 15977–15982.
- 828 Moretti, C., Hosni, T., Vandemeulebroecke, K., Brady, C., de Vos, P., Buonauro, R.,  
829 and Cleenwerck, I. (2011) *Erwinia oleae* sp. nov., isolated from olive knots  
830 caused by *Pseudomonas savastanoi* pv. *savastanoi*. *Int. J. Syst. Evol. Microbiol.*  
831 **61**: 2745–2752.
- 832 Morris, C.E., Sands, D.C., Vanneste, J.L., Montarry, J., Oakley, B., Guilbaud, C., and  
833 Glaux, C. (2010) Inferring the evolutionary history of the plant pathogen  
834 *Pseudomonas syringae* from its biogeography in headwaters of rivers in North  
835 America, Europe, and New Zealand. *MBio* **1**: e00107.
- 836 Nakahara, H., Mori, T., Sadakari, N., Matsusaki, H., and Matsuzoe, N. (2016) Selection  
837 of effective non-pathogenic *Ralstonia solanacearum* as biocontrol agents  
838 against bacterial wilt in eggplant. *J. Plant Dis. Prot.* **123**: 119–124.
- 839 Nowell, R.W., Laue, B.E., Sharp, P.M., and Green, S. (2016) Comparative genomics  
840 reveals genes significantly associated with woody hosts in the plant pathogen  
841 *Pseudomonas syringae*. *Mol. Plant Pathol.* **17**: 1409–1424.
- 842 Oksanen, J., Blanchet, F.G., Friendly, M., Kindt, R., Legendre, P., Dan McGlinn, Peter  
843 R. Minchin, R.B.O., et al. (2016) vegan: Community Ecology Package.
- 844 Omer, M.E.H. and Wood, R.K.S. (1969) Growth of *Pseudomonas phaseolicola* in  
845 susceptible and in resistant bean plants. *Ann. Appl. Biol.* **63**: 103–116.

- 846 Van Overbeek, L. and Van Elsas, J.D. (2008) Effects of plant genotype and growth  
847 stage on the structure of bacterial communities associated with potato  
848 (*Solanum tuberosum* L.). *FEMS Microbiol. Ecol.* **64**: 283–296.
- 849 Petriccione, M., Zampella, L., Mastrobuoni, F., and Scortichini, M. (2017) Occurrence  
850 of copper-resistant *Pseudomonas syringae* pv. *syringae* strains isolated from  
851 rain and kiwifruit orchards also infected by *P. s.* pv. *actinidiae*. *Eur. J. Plant*  
852 *Pathol.* 1–16.
- 853 Pfeilmeier, S., Caly, D.L., and Malone, J.G. (2016) Bacterial pathogenesis of plants:  
854 future challenges from a microbial perspective: Challenges in Bacterial  
855 Molecular Plant Pathology. *Mol. Plant Pathol.* **17**: 1298–1313.
- 856 Polz, M.F., Alm, E.J., and Hanage, W.P. (2013) Horizontal gene transfer and the  
857 evolution of bacterial and archaeal population structure. *Trends Genet.* **29**:  
858 170–175.
- 859 R.Core.Team (2016) R: A language and environment for statistical computing.
- 860 Rosen, M.J., Davison, M., Bhaya, D., and Fisher, D.S. (2015) Fine-scale diversity and  
861 extensive recombination in a quasisexual bacterial population occupying a  
862 broad niche. *Science (80-. )*. **348**: 1019–1024.
- 863 Rozas, J. and Rozas, R. (1995) DnaSP, DNA sequence polymorphism: an interactive  
864 program for estimating population genetics parameters from DNA sequence  
865 data. *CABIOS* **11**: 621–625.
- 866 Rufián, J.S., Macho, A.P., Corry, D.S., Mansfield, J., Arnold, D., and Beuzón, C.R.  
867 (2017) Confocal microscopy reveals in planta dynamic interactions between  
868 pathogenic, avirulent and non-pathogenic *Pseudomonas syringae* strains. *Mol.*  
869 *Plant Pathol.* DOI: 10.1111/mpp.12539.
- 870 Ruhe, Z.C., Low, D.A., and Hayes, C.S. (2013) Bacterial contact-dependent growth  
871 inhibition. *Trends Microbiol.* **21**: 230–237.
- 872 Sarkar, S.F. and Guttman, D.S. (2004) Evolution of the core genome of *Pseudomonas*  
873 *syringae*, a highly clonal, endemic plant pathogen. *Appl. Environ. Microbiol.* **70**:  
874 1999–2012.
- 875 Sawada, H. (2015) Characterization of biovar 3 strains of *Pseudomonas syringae* pv.  
876 *actinidiae* isolated in Japan. *Japanese J. Phytopathology* **81**: 111–126.
- 877 Sawada, H.H., Suzuki, F.F., Matsuda, I.I., and Saitou, N.N. (1999) Phylogenetic  
878 analysis of *Pseudomonas syringae* pathovars suggests the horizontal gene  
879 transfer of *argK* and the evolutionary stability of *hrp* gene cluster. *J. Mol. Evol.*  
880 **49**: 627–644.
- 881 Schäfer, A., Tauch, A., Jäger, W., Kalinowski, J., Thierbach, G., and Pühler, A. (1994)  
882 Small mobilizable multi-purpose cloning vectors derived from the *Escherichia*  
883 *coli* plasmids pK18 and pK19: selection of defined deletions in the chromosome  
884 of *Corynebacterium glutamicum*. *Gene* **145**: 69–73.
- 885 Schloss, P.D., Westcott, S.L., Ryabin, T., Hall, J.R., Hartmann, M., Hollister, E.B., et al.  
886 (2009) Introducing mothur: Open-source, platform-independent, community-  
887 supported software for describing and comparing microbial communities. *Appl.*  
888 *Environ. Microbiol.* **75**: 7537–7541.
- 889 Schmidt, H.A., Strimmer, K., Vingron, M., and von Haeseler, A. (2002) TREE-PUZZLE:  
890 maximum likelihood phylogenetic analysis using quartets and parallel  
891 computing. *Bioinformatics* **18**: 502–504.
- 892 Shapiro, B.J., Friedman, J., Cordero, O.X., Preheim, S.P., Timberlake, S.C., Szabo, G.,

- 893 et al. (2012) Population Genomics of Early Events in the Ecological  
894 Differentiation of Bacteria. *Science* (80-. ). **336**: 48–51.
- 895 Shapiro, B.J. and Polz, M.F. (2014) Ordering microbial diversity into ecologically and  
896 genetically cohesive units. *Trends Microbiol.* **22**: 235–247.
- 897 Singer, M. (2010) Pathogen-pathogen interaction. *Virulence* **1**: 10–18.
- 898 Souza, V., Nguyen, T.T., Hudson, R.R., Piñero, D., and Lenski, R.E. (1992) Hierarchical  
899 analysis of linkage disequilibrium in *Rhizobium* populations: evidence for sex?  
900 *Proc. Natl. Acad. Sci. U. S. A.* **89**: 8389–93.
- 901 Spratt, B.G., Hanage, W.P., Li, B., Aanensen, D.M., and Feil, E.J. (2004) Displaying the  
902 relatedness among isolates of bacterial species -- the eBURST approach. *FEMS*  
903 *Microbiol. Lett.* **241**: 129–134.
- 904 Spratt, B.G. and Maiden, M.C.J. (1999) Bacterial population genetics, evolution and  
905 epidemiology. *Philos. Trans. R. Soc. B Biol. Sci.* **354**: 701–710.
- 906 Stubbendieck, R.M., Vargas-Bautista, C., and Straight, P.D. (2016) Bacterial  
907 communities: Interactions to scale. *Front. Microbiol.* **7**: 1234.
- 908 Tomihama, T., Sekita, T., and Takikawa, Y. (2016) Wide distribution of airborne ice-  
909 nucleation active *Pseudomonas syringae* in agricultural environments.  
910 *Phytopathology* **5159**: 1–49.
- 911 Triplett, L.R., Verdier, V., Campillo, T., Van Malderghem, C., Cleenwerck, I., Maes, M.,  
912 et al. (2015) Characterization of a novel clade of *Xanthomonas* isolated from  
913 rice leaves in Mali and proposal of *Xanthomonas maliensis* sp. nov. *Antonie van*  
914 *Leeuwenhoek, Int. J. Gen. Mol. Microbiol.* **107**: 869–881.
- 915 Visnovsky, S.B., Fiers, M., Lu, A., Panda, P., Taylor, R., and Pitman, A.R. (2016) Draft  
916 genome sequences of 18 strains of *Pseudomonas* isolated from kiwifruit plants  
917 in New Zealand and overseas. *Genome Announc.* **4**: e00061-16.
- 918 Völksch, B. and May, R. (2001) Biological Control of *Pseudomonas syringae* pv.  
919 *glycinea* by Epiphytic Bacteria under Field Conditions. *Microb. Ecol.* **41**: 132–  
920 139.
- 921 Wagner, M.R., Lundberg, D.S., del Rio, T.G., Tringe, S.G., Dangl, J.L., and Mitchell-  
922 Olds, T. (2016) Host genotype and age shape the leaf and root microbiomes of a  
923 wild perennial plant. *Nat. Commun.* **7**: 12151.
- 924 Whipps, J.M., Hand, P., Pink, D., and Bending, G.D. (2008) Phyllosphere microbiology  
925 with special reference to diversity and plant genotype. *J. Appl. Microbiol.* **105**:  
926 1744–1755.
- 927 Wilson, M., Hirano, S.S., and Lindow, S.E. (1999) Location and survival of leaf-  
928 associated bacteria in relation to pathogenicity and potential for growth within  
929 the leaf. *Appl. Environ. Microbiol.* **65**: 1435–1443.
- 930 Wilson, M. and Lindow, S.E. (1994) Coexistence among epiphytic bacterial  
931 Populations mediated through nutritional resource partitioning. *Appl. Environ.*  
932 *Microbiol.* **60**: 4468–4477.
- 933 Young, J.M. (1974) Development of bacterial populations in vivo in relation to plant  
934 pathogenicity. *New Zeal. J. Agric. Res.* **17**: 105–113.
- 935 Zhang, X.X., Gauntlett, J.C., Oldenburg, D.G., Cook, G.M., and Rainey, P.B. (2015) Role  
936 of the transporter-like sensor kinase CbrA in histidine uptake and signal  
937 transduction. *J. Bacteriol.* **197**: 2867–2878.
- 938 Zhao, Z.B., Gao, X.N., Huang, Q.L., Huang, L.L., Qin, H.Q., and Kang, Z.S. (2013)  
939 Identification and characterization of the causal agent of bacterial canker of

940 kiwifruit in the Shaanxi province of China. *J. Plant Pathol.* **95**: 155–162.  
941

942 **FIGURES**

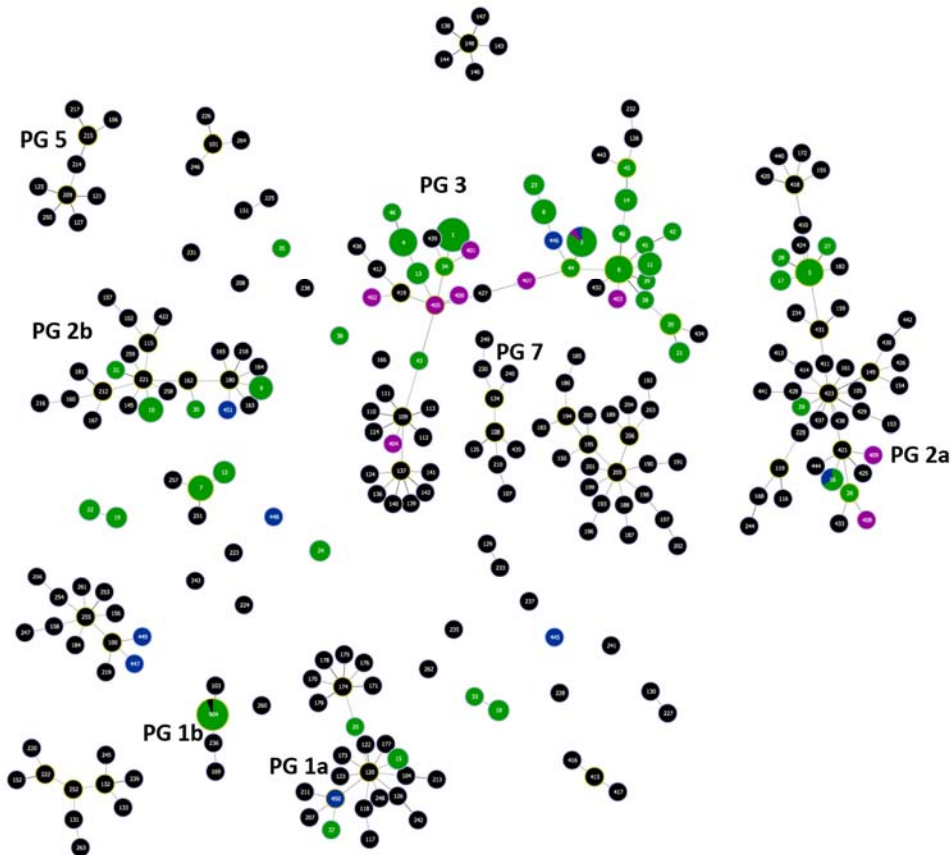

943

944

945 **Figure 1. Global Minimum Spanning Tree (MST).** Displaying the relationships  
946 between STs at the triple-locus-variant level, illustrated using PHYLOViZ (Francisco *et*  
947 *al.*, 2012). The size of the circle correlates with the frequency of the ST. Color-coded  
948 accorded to origin: green = this study, black = PAMDB, blue = Visnovsky *et al.* (2016),  
949 purple = Tomihama *et al.* (2016).

950

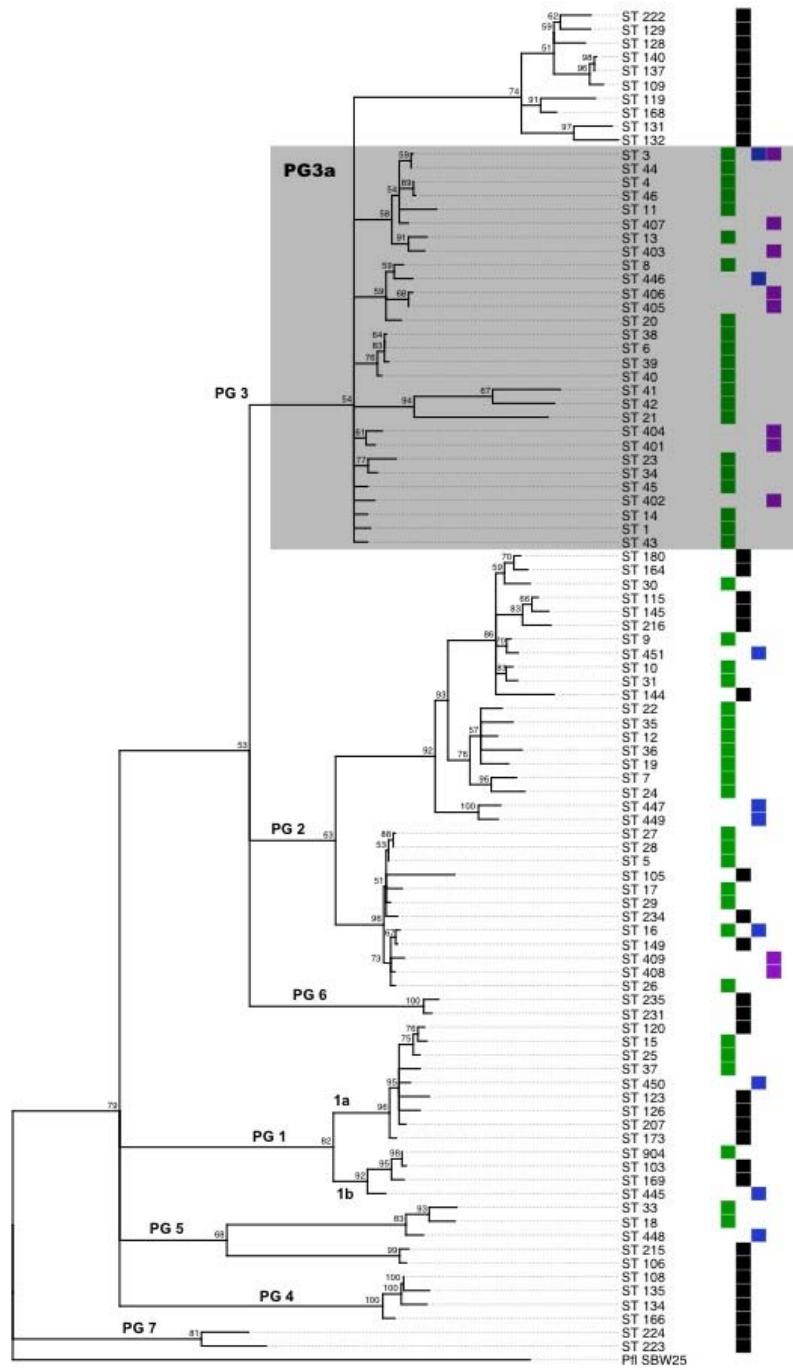

—  
0.01

■ This Study  
■ PAMDB  
■ Tomihama et al. 2016  
■ Visnovsky et al. 2016

952 **Figure 2. Maximum Likelihood tree based on the concatenated alignment (2010**  
953 **bp) of four housekeeping genes: *gapA*, *gyrB*, *gltA* and *rpoD*.** Maximum Likelihood  
954 tree reconstructed using TREEPUZZLE based on the Tamura-Nei model using 100,000  
955 puzzling steps. Single representative sequences for each ST were used to improve  
956 readability (frequency of each ST and corresponding strain names listed in Table S2).  
957 Values indicated at nodes are bootstrap values. The corresponding phylogroups (PG)  
958 are indicated, eg. PG1 = phylogroup 1 with clades 1a and 1b. Origin of isolates is  
959 illustrated in colour coded boxes, green = this study, black = PAMDB, blue =  
960 Visnovsky et al. 2016, purple = Tomihama et al. 2016

961

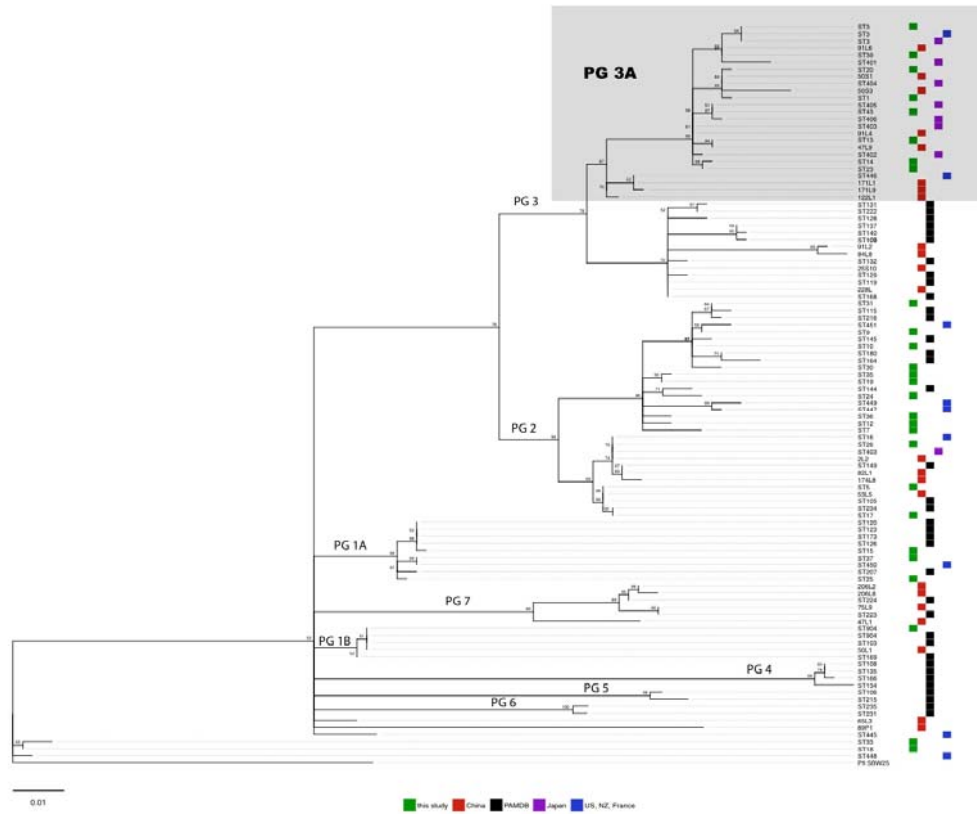

962

963 **Figure 3. Global ML tree reconstructed from *gltA* sequences highlighting the**  
964 **particularity of PG3a, which includes kiwifruit isolates from NZ, China, Japan, the**  
965 **US and France.** The tree was built on a 529 bp alignment using TREEPUZZLE (HKY  
966 model; 100,000 puzzling steps), using *Pseudomonas fluorescens* SBW25 as outgroup.  
967 Values indicated at nodes are bootstrap values. The source of each isolate is  
968 highlighted in colour-coded boxes, green = this study, red = China, black = PAMDB,  
969 purple = Japan, blue = US, NZ and France.

970

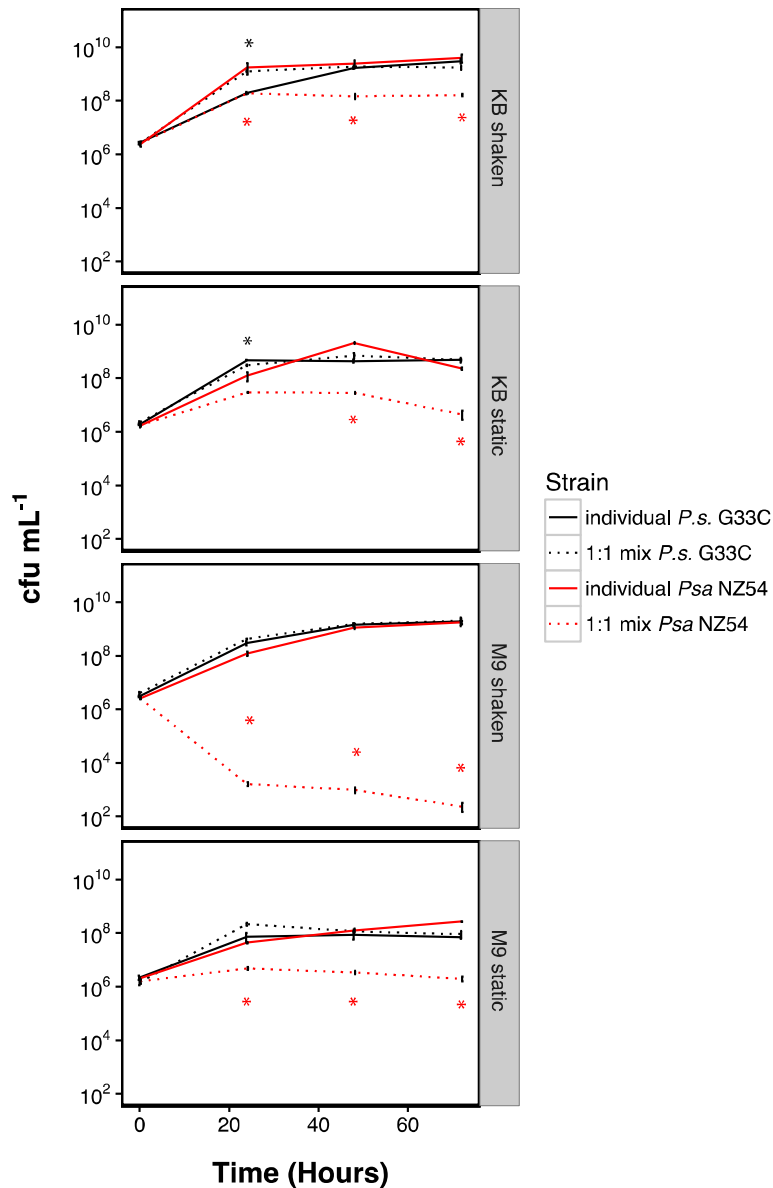

971

972 **Figure 4. Individual growth dynamics of *Psa* NZ54 and *P. syringae* G33C compared**  
973 **with co-inoculation (1:1 ratio) *in vitro*.** Competition experiments were performed in  
974 a 1:1 ratio (founding ratio  $5 \times 10^6$  cfu mL<sup>-1</sup> each), with individual inoculations as  
975 reference. Solid lines represent individual growth and dashed lines represent growth  
976 in competition. The presented mean and standard error were calculated from three  
977 replicates. Asterisk indicate significance between individual and co-cultured growth  
978 at the 5% level (paired *t*-test).



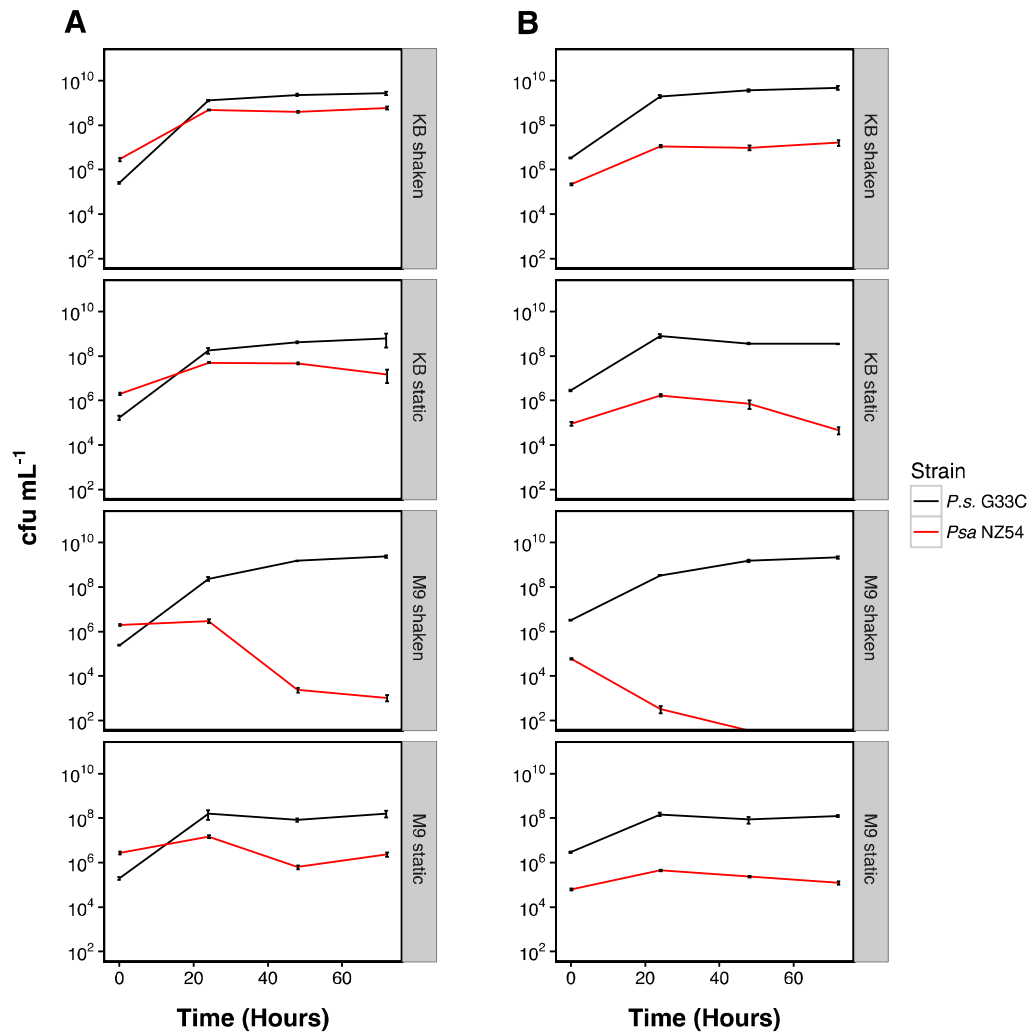

979

980 **Figure 5. *In vitro* growth curves from invasion from rare experiments for *Psa* NZ54 :**

981 ***P. syringae* G33C and vice versa.** Vials were inoculated with a (A) 10:1 ratio and (B)

982 1:10 ratio for *Psa* NZ54 : *P. syringae* G33C. The presented mean and standard error

983 were calculated from three replicates. Parameters of relative fitness of *Psa* NZ54

984 relative to *P. syringae* G33C calculated as  $\ln$  difference *Psa* NZ54 – *P. syringae* G33C

985 using the Malthusian parameters at 24hrs were  $-2.1^* \pm 0.02$  (KB shaken),  $-1.9^* \pm 0.05$

986 (KB static),  $-12.1^* \pm 0.09$  (M9 shaken) and  $-3.9^* \pm 0.00$  (M9 static). Asterisks indicate

987 significance at the 1% level (Students *t*-test).

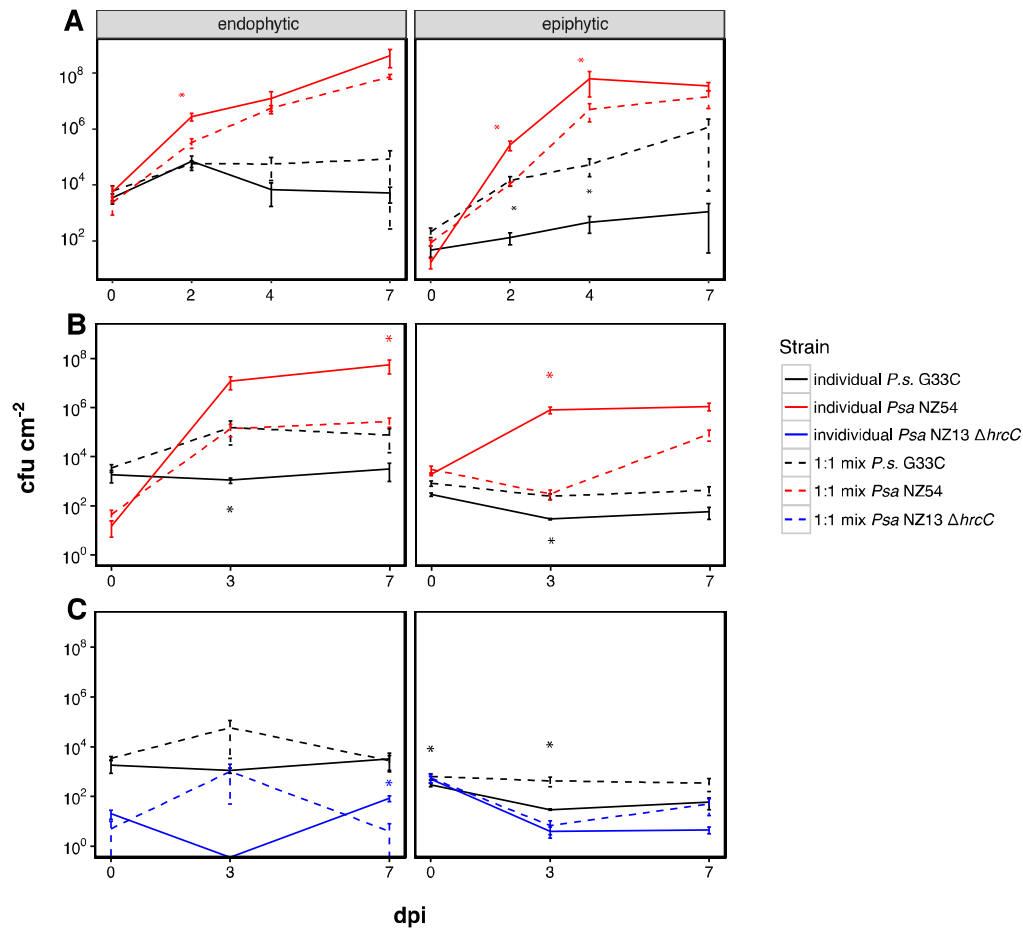

988

989 **Figure 6. 1:1 competition growth assays of *Psa* NZ54 vs. *P. syringae* G33C in *planta*.**

990 'Hort16A' plantlets (A) and 'SunGold' plantlets (B) were inoculated with a 1:1 mix of

991 *P. syringae* G33C : *Psa* NZ54 (founding density  $8 \times 10^7$  cfu ml<sup>-1</sup>). (C) 'SunGold' plants

992 were inoculated with 1:1 mix of *P. syringae* G33C : *Psa* NZ13  $\Delta hrcC$  (founding density

993  $8 \times 10^7$  cfu ml<sup>-1</sup>). Solid lines represent individual growth and dashed lines represent

994 growth in competition. The presented mean and standard error were calculated

995 from the mean of four ('Hort16A') and five ('SunGold') individual measurements.

996 Asterisk indicate significance between individual and co-cultured growth at the 5%

997 level (paired *t*-test).

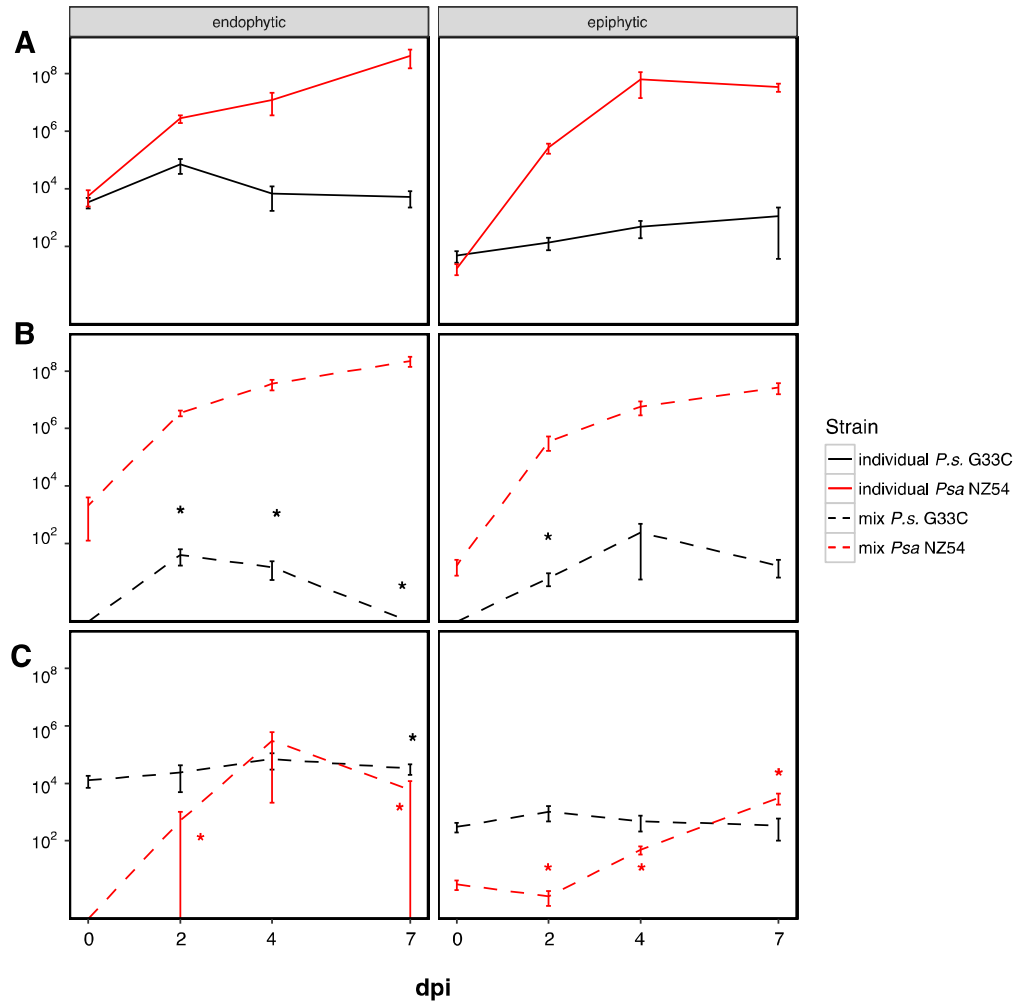

998  
999

**Figure 7. Invasion from rare experiments for *Psa* NZ54 : *P. syringae* G33C in planta.**

1000 'Hort16A' plantlets were inoculated with different ratios of strains *Psa* NZ54 : *P.*  
1001 *syringae* G33C. A) Individual growth. B) Invasion from rare 100:1 and C) invasion  
1002 from rare 1:100. Solid lines represent individual growth and dashed lines represent  
1003 growth in competition. The presented mean and standard error were calculated  
1004 from the mean of four individual measurements. Asterisks indicate significance  
1005 between individual and co-cultured growth at the 5% level (paired *t*-test).

1006

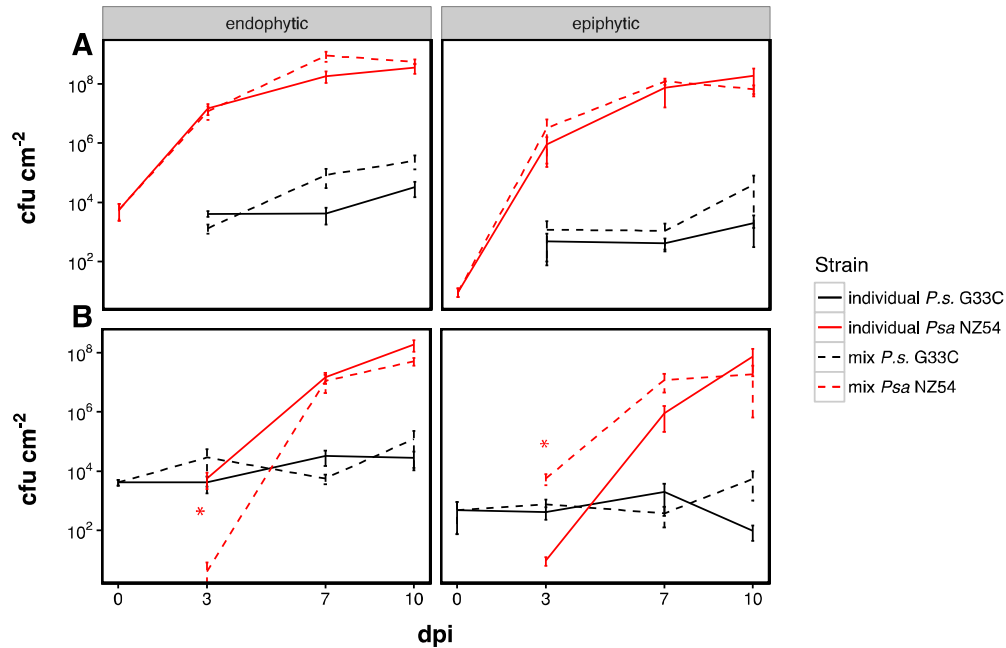

1007

1008 **Figure 8. *In planta* priority effect of *Psa* NZ54 or *P. syringae* G33C with subsequent**  
1009 **inoculation of the respective second strain with the same founding density. (A) *In***  
1010 ***planta* growth assay of *P. syringae* G33C using 'Hort16A' plantlets pre-inoculated for**  
1011 **three days with *Psa* NZ54 ( $8 \times 10^7$  cfu ml<sup>-1</sup>). (B) *in planta* growth assay of *Psa* NZ54**  
1012 **using 'Hort16A' plantlets pre-inoculated for three days with *P. syringae* G33C ( $8 \times 10^7$**   
1013 **cfu ml<sup>-1</sup>). Solid lines represent individual growth and dashed lines represent growth**  
1014 **in competition. The presented mean and standard error were calculated from the**  
1015 **mean of five individual measurements. Asterisks indicate significance between**  
1016 **individual and co-cultured growth at the 5% level (paired *t*-test).**

1017 **TABLES**

1018 **Table 1: Nucleotide and amino acid diversity.** L = length in bp, AA = amino acid, GC =  
 1019 average GC content in %,  $N_A$  = number of alleles, P = number of polymorphic sites,  
 1020  $d_N/d_S$  ratio, mut = mutations,  $\pi$  = nucleotide diversity indices,  $\theta$  = Watterson's  
 1021 theta.

| Locus       | L<br>(bp) | AA<br>length | GC    | $N_A$ | P*          | $d_N/d_S$ | mut | $\pi$ | $\theta$ |
|-------------|-----------|--------------|-------|-------|-------------|-----------|-----|-------|----------|
| <i>gapA</i> | 476       | 158          | 60.81 | 25    | 80 (16.81)  | 3.365     | 97  | 0.055 | 0.024    |
| <i>gyrB</i> | 507       | 169          | 53.15 | 28    | 145 (28.60) | 0.018     | 184 | 0.054 | 0.041    |
| <i>gltA</i> | 529       | 176          | 58.45 | 27    | 88 (16.64)  | 0.011     | 102 | 0.040 | 0.025    |
| <i>rpoD</i> | 495       | 166          | 59.56 | 35    | 99 (20)     | 2.022     | 118 | 0.042 | 0.030    |
| Mean        | 502       | 167          | 57.99 | 29    | 105 (20.51) | 1.354     | 125 | 0.048 | 0.030    |

1022

1023 **Table 2: Average pairwise genetic diversity between and among phylogroups.**

1024 Analyses were conducted on the concatenated alignment (2006 bp, gaps removed)  
 1025 using the Maximum Composite Likelihood model with a gamma distribution of 1. N=  
 1026 number of strains.

| N  | Phylogroup | 1     | 2     | 5     | 3     |
|----|------------|-------|-------|-------|-------|
| 19 | 1          | 0.010 |       |       |       |
| 43 | 2          | 0.098 | 0.027 |       |       |
| 3  | 5          | 0.111 | 0.106 | 0.008 |       |
| 83 | 3          | 0.099 | 0.063 | 0.107 | 0.014 |

1027  
 1028  
 1029  
 1030

1031 **Table 3: LDhat recombination analysis.** Showing the length of the alignment in bp, N

1032 = number of sequences, mutation rate  $\theta$  ( $=2Ne\mu$ ) per site, recombination rate  $\rho$

1033 ( $=2Ner$ ) per site, ratio  $\epsilon = \rho / \theta$  and Tajima's D.

1034

| Gene                           | Length (bp) | N   | Segregating sites | $\theta$ | $\rho$ | $\epsilon = \rho/\theta$ | Tajima's D |
|--------------------------------|-------------|-----|-------------------|----------|--------|--------------------------|------------|
| <b>All <i>P. syringae</i>:</b> |             |     |                   |          |        |                          |            |
| concatenated                   | 2010        | 148 | 335               | 0.030    | 0.006  | 0.187                    | 0.513      |
| <i>gapA</i>                    | 476         | 148 | 63                | 0.024    | 0.021  | 0.902                    | 2.204      |
| <i>gyrB</i>                    | 507         | 148 | 116               | 0.041    | 0.038  | 0.931                    | -0.204     |
| <i>gltA</i>                    | 529         | 148 | 74                | 0.025    | 0.012  | 0.461                    | 0.678      |
| <i>rpoD</i>                    | 498         | 148 | 82                | 0.030    | 0.012  | 0.416                    | 0.03       |
| <b>Phylogroup 1</b>            |             |     |                   |          |        |                          |            |
| concat                         | 2010        | 19  | 66                | 0.009    | 0.000  | 0.000                    | 0.207      |
| <i>gapA</i>                    | 476         | 19  | 8                 | 0.005    | 0.000  | 0.000                    | 0.407      |
| <i>gyrB</i>                    | 507         | 19  | 20                | 0.011    | 0.000  | 0.000                    | 0.611      |
| <i>gltA</i>                    | 529         | 19  | 19                | 0.010    | 0.000  | 0.000                    | 0.026      |
| <i>rpoD</i>                    | 498         | 19  | 19                | 0.011    | 0.000  | 0.000                    | -0.188     |
| <b>Phylogroup 2</b>            |             |     |                   |          |        |                          |            |
| concat                         | 2010        | 43  | 147               | 0.017    | 0.002  | 0.120                    | 1.754      |
| <i>gapA</i>                    | 476         | 43  | 29                | 0.014    | 0.006  | 0.457                    | 2.307      |
| <i>gyrB</i>                    | 507         | 43  | 63                | 0.029    | 0.000  | 0.000                    | 2.131      |
| <i>gltA</i>                    | 529         | 43  | 27                | 0.012    | 0.008  | 0.654                    | 0.993      |
| <i>rpoD</i>                    | 498         | 43  | 28                | 0.013    | 0.023  | 1.734                    | 0.621      |
| <b>Phylogroup 3</b>            |             |     |                   |          |        |                          |            |
| concat                         | 2010        | 83  | 163               | 0.016    | 0.015  | 0.937                    | -0.746     |
| <i>gapA</i>                    | 476         | 83  | 34                | 0.014    | 0.013  | 0.898                    | 2.096      |
| <i>gyrB</i>                    | 507         | 83  | 96                | 0.038    | 0.024  | 0.636                    | -2.434     |
| <i>gltA</i>                    | 529         | 83  | 13                | 0.005    | 0.006  | 1.175                    | 1.991      |
| <i>rpoD</i>                    | 498         | 83  | 20                | 0.008    | 0.033  | 4.073                    | 0.3        |
| <b>Phylogroup 5</b>            |             |     |                   |          |        |                          |            |
| concat                         | 2010        | 3   | 23                | 0.008    | 0.000  | 0.000                    | -          |
| <i>gapA</i>                    | 476         | 3   | -                 | -        | -      | -                        | -          |
| <i>gyrB</i>                    | 507         | 3   | 13                | 0.017    | 0.000  | 0.000                    | -          |
| <i>gltA</i>                    | 529         | 3   | 3                 | 0.004    | 0.000  | 0.000                    | -          |
| <i>rpoD</i>                    | 498         | 3   | 7                 | 0.009    | 0.000  | 0.000                    | -          |

1035

1036

1037 SUPPORTING FIGURES

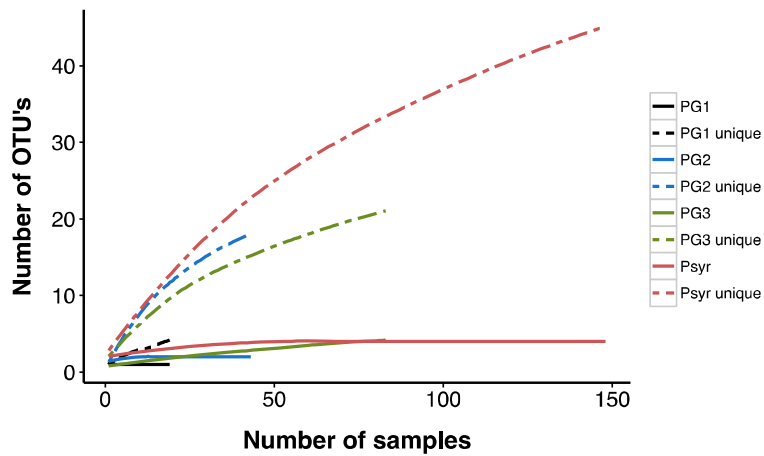

1038

1039

**Figure S1. Rarefaction curves based on the concatenated sequences.** Two curves

1040

each are shown for *P. syringae* (n=148) and the sequences grouped according to

1041

phylogroups (PG): solid lines represent grouping based on unique STs and dashed

1042

lines according to a cut-off equal to the average pairwise genetic distance of the

1043

group: PG1, PG2 & PG3 = 0.02 cut-off, Psyr all = 0.05 cut-off.

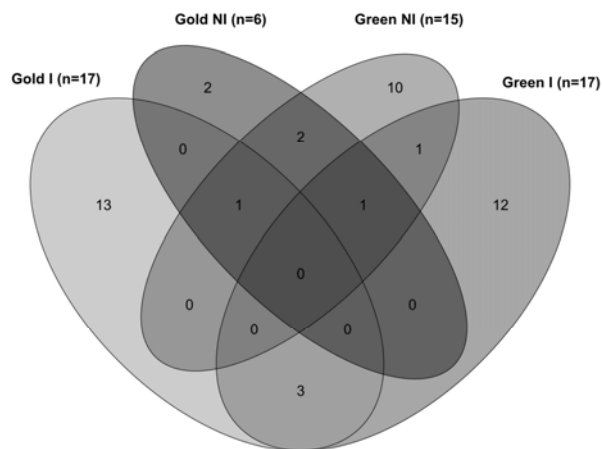

1044

1045

**Figure S2. Shared and unique STs among orchards.** Gold I = infected 'Hort16A'; Gold

1046

NI= uninfected 'Hort16A'; Green NI = uninfected 'Hayward'; Green I = infected

1047

'Hayward' orchard; n= number of STs found in orchard.

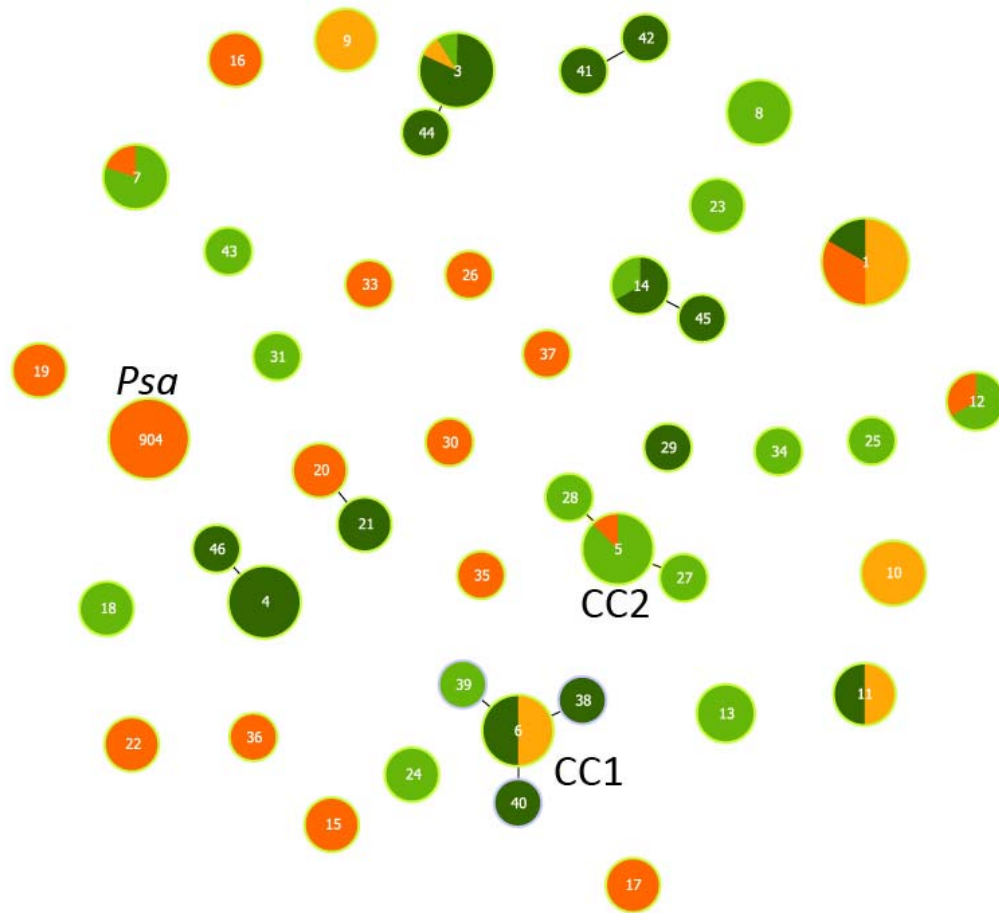

1048

1049 **Figure S3. eBurst snapshot of STs at the single locus variant level.** The size of the

1050 circles correlates with the frequency of the respective ST found in the dataset.

1051 Colours correspond to the different orchards, orange = infected 'Hort16A', yellow =

1052 uninfected 'Hort16A, dark green = infected 'Hayward', light green = uninfected

1053 'Hayward'. CC = clonal complex.



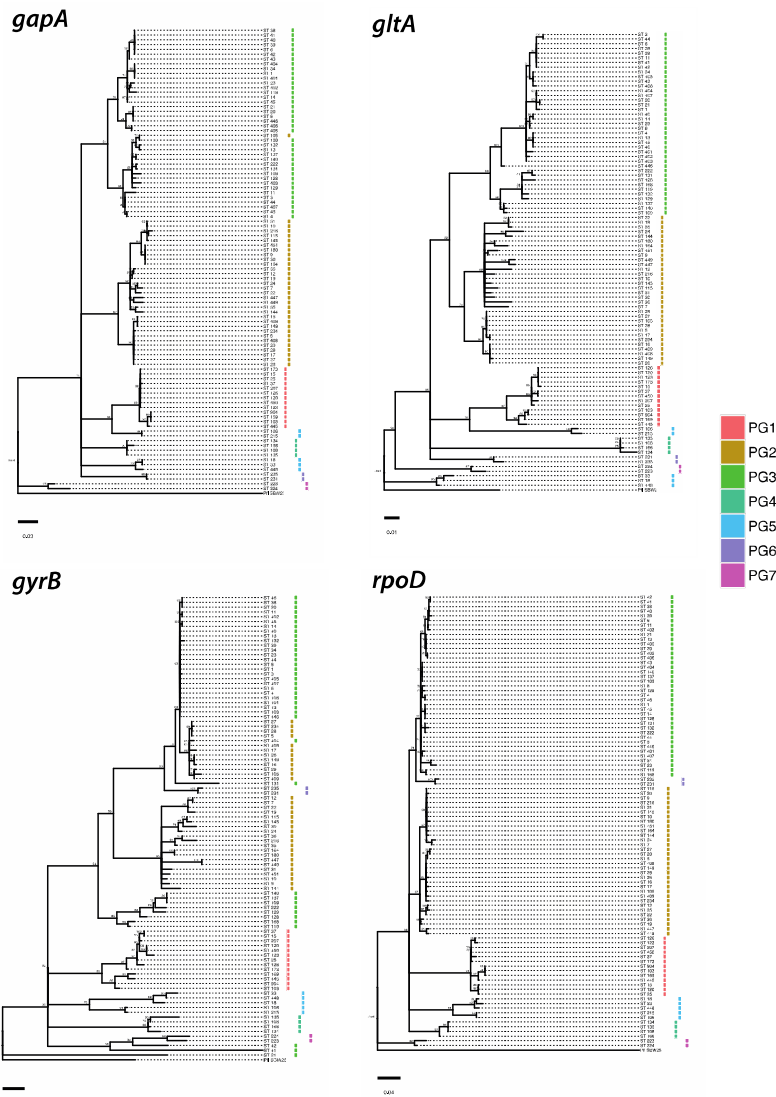

1054

1055 **Figure S4. Maximum Likelihood trees based on single genes.** Each Maximum  
1056 Likelihood tree is rooted on *Pseudomonas fluorescens* SBW 25 and was  
1057 reconstructed using TREEPUZZLE based on the Tamura-Nei model using 100,000  
1058 puzzling steps. Trees were built using single representatives of each unique ST to  
1059 improve readability of the tree. Values indicated at nodes are bootstrap values. The  
1060 corresponding phylogroup distinctions based on the concatenated ML tree are  
1061 indicated with the coloured squares.

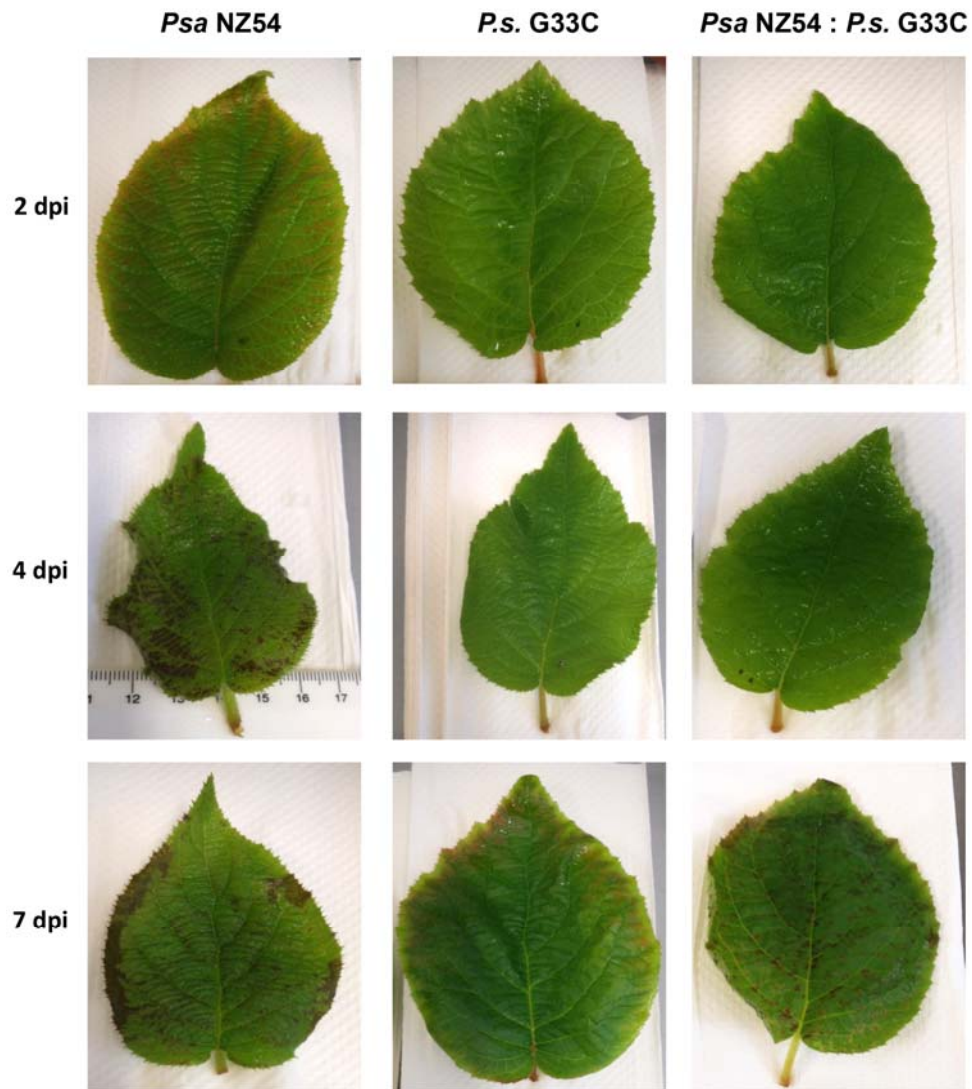

1062

1063 **Figure S5. Leaves of 'Hort16A' plants inoculated with *Psa* NZ54, *P. syringae* G33C**

1064 **and a 1:1 mix of *Psa* NZ54 : *P. syringae* G33C at 2, 4, and 7 days post inoculation.**

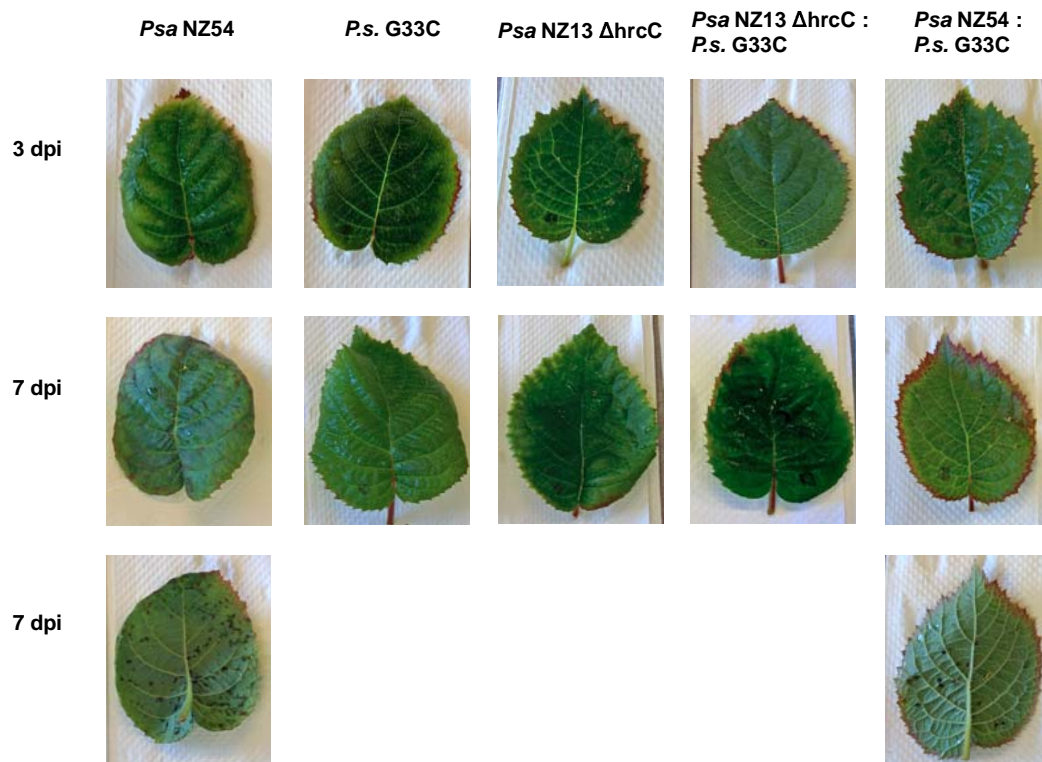

1065  
 1066 **Figure S6. Leaves of ‘SunGold’ plants inoculated with *Psa* NZ54, *P. syringae* G33C, *Psa* NZ13  $\Delta$ hrcC and 1:1 mix of the respective strain**  
 1067 **combinations at 3 and 7 days post inoculation.** For leaves showing minor leaf spots, the lower side of the leaf is also shown for easier  
 1068 detection of symptoms.

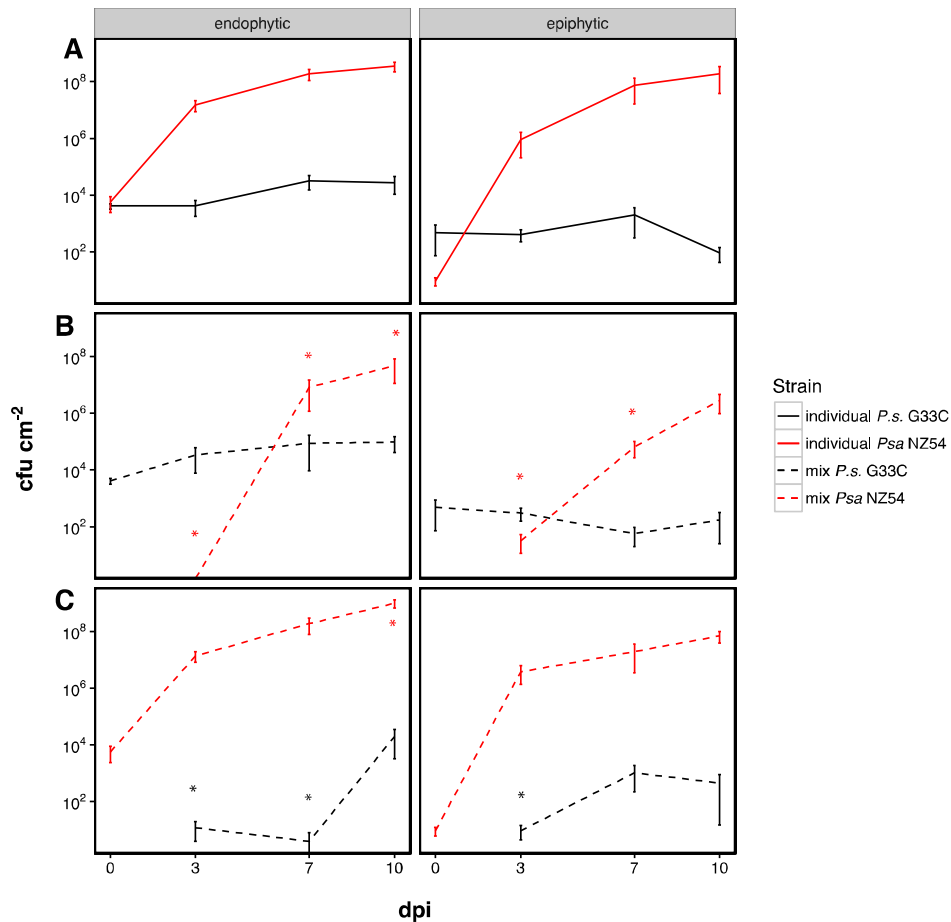

1069

1070 **Figure S7. *In planta* priority effect of *Psa* NZ54 or *P. syringae* G33C with subsequent**

1071 **inoculation of the second strain with 100-fold lower concentration. *In planta***

1072 growth assay using 'Hort16A' plantlets pre-inoculated ( $8 \times 10^7$  cfu ml<sup>-1</sup>) with one strain

1073 followed by inoculation of the second strain at ( $8 \times 10^5$  cfu ml<sup>-1</sup>). The two panels

1074 display growth curves for endo- and epiphytic growth respectively. A) Individual

1075 growth, B) inoculation of *Psa* NZ 54 at day 3 and C) inoculation of *P. syringae* G33C at

1076 3 dpi. Solid lines represent individual growth and dashed lines represent growth in

1077 competition. The presented mean and standard error were calculated from the

1078 mean of five individual measurements. Asterisks indicate significance between

1079 individual and co-cultured growth at the 5% level (paired *t*-test).

1080 **SUPPORTING TABLES**

1081 **Table S1. Geographic location of orchards, strain summaries and diversity indices**

1082 **per orchard.** Specification of cultivar and infection status at the time according to

1083 KVH (Kiwifruit Vine Health), orchard ID, GPS coordinates, location and month of

1084 sampling, N = number of collected *P. syringae* strains, N PG3a = number of PG3a

1085 strains in total sample, N STs = number of unique STs, N STs PG3a = number of

1086 unique STs grouping with PG3a, D = Simpsons index of diversity,  $D_c$  = converted to

1087 effective number of species, ED = Simpsons evenness.

1088 **Table S2. List of all strains.** Strain information and assigned sequence type of strains

1089 used for MLST study (all) and strains used for phylogenetic analysis (highlighted in

1090 grey). Phylogroup association only provided for isolates used for phylogenetic

1091 analysis. Alias provides the name used for competition experiments.

1092 **Table S3. PERMANOVA results of 3-factor nested analysis for differences in genetic**

1093 **diversity.**

1094 **Table S4. LDhat recombination analysis for host and disease status.** Length of

1095 alignment in bp, number of sequences, number of segregating sites, mutation rate  $\theta$ ,

1096 recombination rate  $\rho$  and ratio  $\epsilon$  ( $\rho/\theta$ ).

1097 **Table S5. LDhat recombination analysis for global data sorted according to**

1098 **phylogroup (PG).** Length of alignment in bp, N = number of sequences, number of

1099 segregating sites, mutation rate  $\theta$ , recombination rate  $\rho$  and ratio  $\epsilon$  ( $\rho/\theta$ ).

1100 **Table S6. List of primers used for construction of the deletion mutant *Psa* NZ13**

1101 ***ΔhrcC*.**

1102
